# Supplementary material for: Nucleoside phosphitylation using ionic liquid stabilised phosphorodiamidites and mechanochemistry
Source: Royal Society of Chemistry journal article supplement (doi:10.1039/c2cc36367d), 2012-01-01
Supplement: c2cc36367d.pdf [file c2cc36367d.pdf]

## Supporting Information

### Experimental

#### General procedures

The product distribution for the reaction of  $\text{PCl}_3$  for the synthesis of phosphorodiamidites/phosphoramidite was examined in situ by  $^{31}\text{P}$  NMR and  $^1\text{H}$ - $^{31}\text{P}$  coupled NMR. The phosphorodiamidites/phosphoramidite were prepared in either 1-butyl-2,3-dimethylimidazolium bis{(trifluoromethyl)sulfonyl}imide ( $[\text{C}_4\text{dmim}][\text{NTf}_2]$ ), 1-butyl-3-methylimidazolium bis{(trifluoromethyl)sulfonyl}imide ( $[\text{C}_4\text{mim}][\text{NTf}_2]$ ) or 1-methylpyrrolidinium bis{(trifluoromethyl)sulfonyl}imide ( $[\text{C}_4\text{mpyr}][\text{NTf}_2]$ ). The ionic liquids were prepared in house using standard literature methods from the appropriate bromide salt.<sup>1</sup> 1-Hexyl-3-methylimidazolium tris(pentafluoroethyl)trifluorophosphate ( $[\text{C}_6\text{mim}][\text{FAP}]$ ) was supplied by Merck KGaA. All ionic liquids were dried under high vacuum for 2 h prior to use. The water content for each ionic liquid was measured using Karl Fischer titration. In each case, the water content for the dried ionic liquid was <0.04 wt%.

$\text{PCl}_3$ , 3-hydroxypropionitrile, Hünig's base, diisopropylamine, ethylmethanamine, morpholine and pyrrolidine were obtained from Aldrich and used as supplied. DCM was distilled over calcium hydride prior to use. The activators, pyridinium trifluoroacetate (Py.TFA) and *N*-methylimidazolium triflate (NMI.Tf) were prepared according to procedures reported in the literature and were dried under high vacuum prior to use. Each nucleoside was azeotroped with acetonitrile three times and then dried under high vacuum prior to use.

#### Spectroscopic details

All the  $^{31}\text{P}$ ,  $^1\text{H}$ - $^{31}\text{P}$ ,  $^1\text{H}$  and  $^{13}\text{C}$  nuclear magnetic resonance spectra were recorded on a Bruker Avance 300 or 400 MHz NMR spectrometer at 25 °C. For ionic liquid samples an aliquot was transferred directly into the NMR tube with no addition of deuterated solvents. The  $^{31}\text{P}$  NMR chemical were recorded in parts per million (ppm) relative to an external probe using a sealed capillary containing triethylphosphate ( $\text{PO}(\text{OEt})_3$ ) in DMSO (solvent used for locking/shimming optimization) inside the NMR tube. The  $\text{PO}(\text{OEt})_3$  probe was referenced to 0.2 ppm. For the nucleotides the NMR was recorded in  $\text{CDCl}_3$  referenced to 0.00 ppm using TMS for the  $^1\text{H}$  NMR and 77.0 ppm using  $\text{CDCl}_3$  for the  $^{13}\text{C}$  NMR.

## General experimental conditions

### Phosphorodiamidites

To a stirred solution of  $\text{PCl}_3$  in dried  $[\text{NTf}_2]$ -based ionic liquid (2 eq) under an inert atmosphere of  $\text{N}_2$ , Hünig's Base (1 eq) was added. After vigorous stirring for 5 min, cyanoethanol (1 eq) was added and the reaction stirred for a further 30 min. The nucleophilic amine (4 eq) was then added and the reaction stirred for a further 120 min after which the reaction was complete. Isolation was achieved via extraction with anhydrous diethyl ether.  $[\text{C}_6\text{mim}][\text{FAP}]$  was added to the extraction mixture after separation but prior to concentration to stabilize of the phosphorodiamidites.

### Bis-(morpholino)-2-cyanoethoxyphosphite (1), synthesised in $[\text{C}_4\text{mpyrr}][\text{NTf}_2]$

$^1\text{H NMR}$  (300 MHz,  $\text{CDCl}_3$ )  $\delta$  2.67 (t, 2H,  $J=6.2$  Hz,  $\text{OCH}_2\text{CH}_2\text{CN}$ ), 3.01 (m, 4H, 2  $\text{NCH}_2\text{CH}_2\text{O}$ ), 3.57-3.65 (m, 4H, 2  $\text{NCH}_2\text{CH}_2\text{O}$ ), 3.88 (dt, 2H,  $J=7.4, 6.2$  Hz,  $\text{OCH}_2\text{CH}_2\text{CN}$ ).  $^{13}\text{C NMR}$  (75 MHz,  $\text{CDCl}_3$ )  $\delta$  20.7 (d,  $J=7.5$  Hz), 45.5 (d,  $J=14.9$  Hz), 60.0 (d,  $J=20.7$  Hz), 68.3 (d,  $J=6.3$  Hz), 117.62.  $^{31}\text{P NMR}$  (121 MHz,  $\text{CDCl}_3$ )  $\delta$  130.6. **HRMS** (ES,  $\text{M} + \text{H}^+$ ) calculated for  $\text{C}_{11}\text{H}_{20}\text{N}_3\text{O}_3\text{P}$  274.1321, found 274.1310.

### 2-Cyanoethyl-*N,N,N',N'*-ethylmethylphosphoramidite (2), synthesised in $[\text{C}_4\text{mim}][\text{NTf}_2]$

$^1\text{H NMR}$  (300 MHz,  $\text{CDCl}_3$ ) 1.06 (t, 6H,  $J=7.1$  Hz, 2  $\text{NCH}_2\text{CH}_3$ ), 2.56 (d, 6H,  $J=7.1$  Hz, 2  $\text{NCH}_3$ ), 2.64 (t, 2H,  $J=6.5$  Hz,  $\text{OCH}_2\text{CH}_2\text{CN}$ ), 3.12-2.86 (m, 4H, 2  $\text{NCH}_2\text{CH}_3$ ), 3.78 (dt, 2H,  $J=7.6, 6.4$  Hz,  $\text{OCH}_2\text{CH}_2\text{CN}$ ).  $^{13}\text{C NMR}$  (75 MHz,  $\text{CDCl}_3$ )  $\delta$  14.7 (d,  $J=4.4$  Hz), 20.6 (d,  $J=7.5$  Hz), 32.5 (d,  $J=8.8$  Hz), 44.4 (d,  $J=28.3$  Hz), 59.3 (d,  $J=19.6$  Hz), 118.2.  $^{31}\text{P NMR}$  (121 MHz,  $\text{CDCl}_3$ ) 135.0. **HRMS** (ES,  $\text{M} + \text{H}^+$ ) calculated for  $\text{C}_{11}\text{H}_{20}\text{N}_3\text{O}_3\text{P}$  218.1422, found 218.1428.

### Bis-(pyrrolidino)-2-cyanoethoxyphosphite (3), synthesised in $[\text{C}_4\text{mim}][\text{NTf}_2]$

$^1\text{H NMR}$  (300 MHz,  $\text{CDCl}_3$ )  $\delta$  1.75-1.79 (m, 8H, 2  $\text{NCH}_2\text{CH}_2$ ), 2.62 (t, 2H,  $J=6.2$  Hz,  $\text{OCH}_2\text{CH}_2\text{CN}$ ), 3.07-3.13 (m, 8H, 2  $\text{NCH}_2\text{CH}_2$ ), 3.81-3.88 (m, 2H,  $\text{OCH}_2\text{CH}_2\text{CN}$ ).  $^{13}\text{C NMR}$  (75 MHz,  $\text{CDCl}_3$ )  $\delta$  20.9 (d,  $J=6.6$  Hz), 26.4 (d,  $J=4.8$  Hz), 47.0 (d,  $J=15.8$  Hz), 59.3 (d,  $J=19.6$  Hz), 118.2.  $^{31}\text{P NMR}$  (121 MHz,  $\text{CDCl}_3$ )  $\delta$  133.6. **HRMS** (ES,  $\text{M} + \text{H}^+$ ) calculated for  $\text{C}_{11}\text{H}_{20}\text{N}_3\text{OP}$  242.1422, found 242.1412.

### Bis-(2-cyanoethyl)-*N,N*-diisopropylphosphoramidite (4)

To a stirred solution of  $\text{PCl}_3$  in dried  $[\text{C}_4\text{dmim}][\text{NTf}_2]$  (2 eq) under an inert atmosphere of  $\text{N}_2$ , Hünig's base (2 eq) was added. After vigorous stirring for 5 min, cyanoethanol (2 eq) was added and the reaction stirred for a further 30 min. The nucleophilic amine (2 eq) was then added and the reaction stirred for a further 40 min after which the reaction was complete. Isolation was achieved via extraction with

anhydrous diethyl ether. [C<sub>6</sub>mim][FAP] was added to the extraction mixture after separation but prior to concentration to stabilize of the phosphoramidite.

**<sup>1</sup>H NMR** (300 MHz, CDCl<sub>3</sub>) δ 1.20 (t, 12H, *J*=6.8 Hz, NCH(CH<sub>3</sub>)<sub>2</sub>), 2.66 (t, 4H, *J*= 6.2 Hz, 2 OCH<sub>2</sub>CH<sub>2</sub>CN), 3.56-3.69 (m, 2H, NCH(CH<sub>3</sub>)<sub>2</sub>), 3.77-3.96 (m, 4H, 2 OCH<sub>2</sub>CH<sub>2</sub>CN). **<sup>13</sup>C NMR** (75 MHz, CDCl<sub>3</sub>) 20.4 (d, *J*= 6.8), 24.6 (d, *J*=7.2), 43.3 (d, *J*=12.4), 58.5 (d, *J*=18.8), 117.6. **<sup>31</sup>P NMR** (121 MHz, CDCl<sub>3</sub>) 149.1. **HRMS** (ES, M+H) calculated for C<sub>12</sub>H<sub>22</sub>N<sub>3</sub>O<sub>2</sub>P 272.1528, found 272.1530

The <sup>31</sup>P NMR spectra for the phosphorodiamidites, **1-4**, stabilized in [C<sub>6</sub>mim][FAP] and <sup>1</sup>H, <sup>13</sup>C and <sup>31</sup>P NMR spectra for **4** in its pure form are shown in Figures **S1-S4**. In each case, the mole ratio of phosphorodiamidite to ionic liquid was typically 1:1. Each of the spectra shows the phosphorodiamidites/phosphoramidite at between 123-148 ppm, the [FAP]<sup>-</sup> anion at -150ppm and the internal standard (PO(OEt)<sub>3</sub>) at 0.2ppm.

**Figure S1**  $^{31}\text{P}$  NMR of phosphorodiamidite, **1**, stabilized in  $[\text{C}_6\text{mim}][\text{FAP}]$

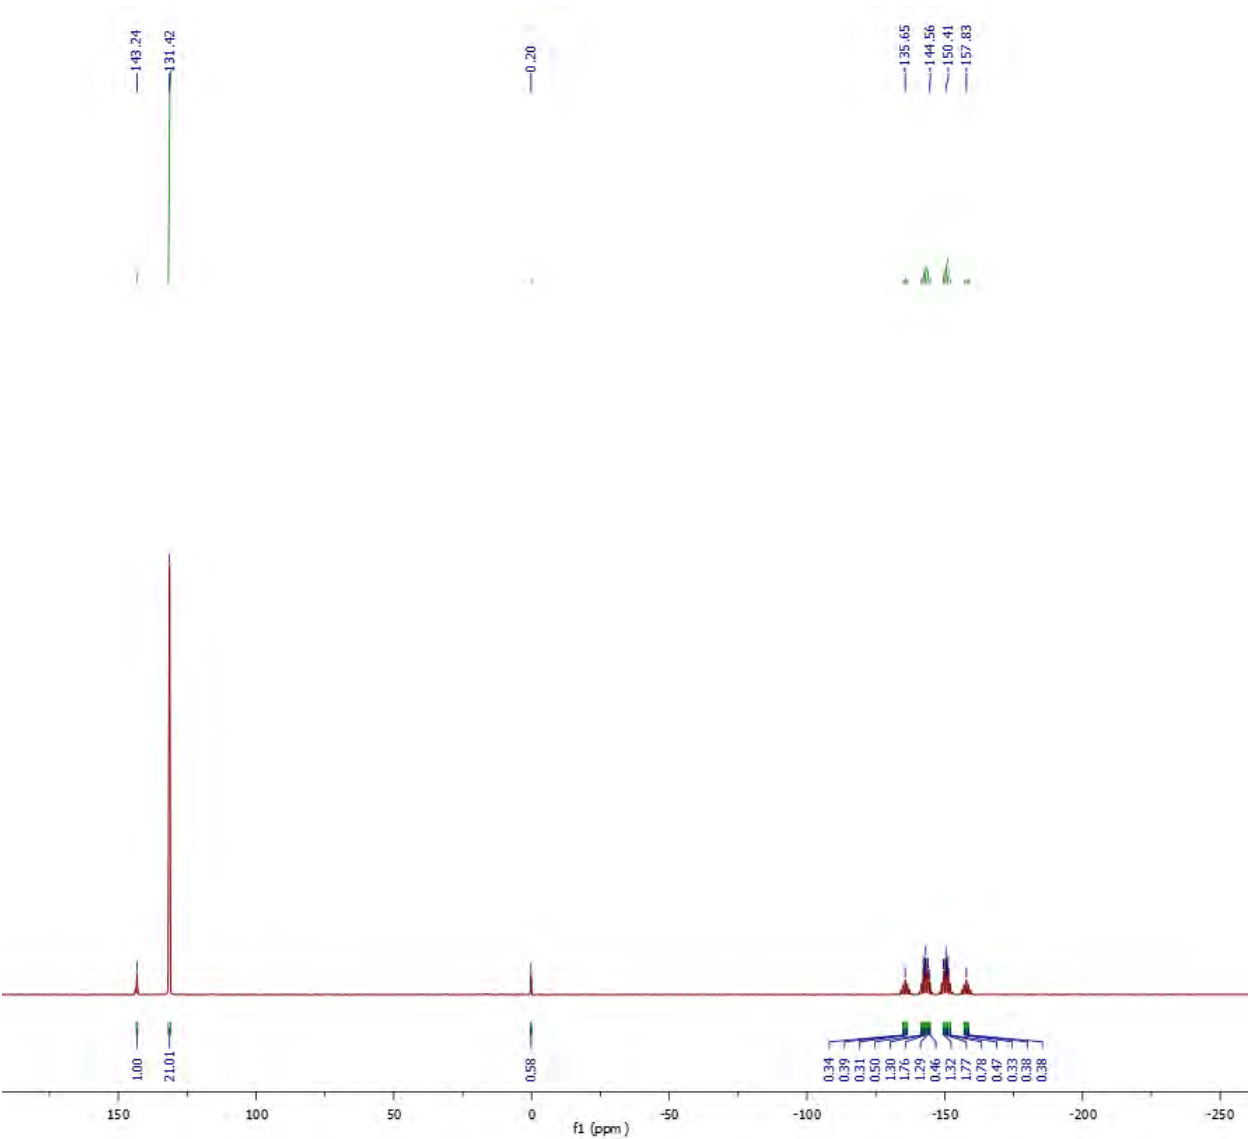

**Figure S2**  $^{31}\text{P}$  NMR of phosphorodiamidite, **2**, stabilized in  $[\text{C}_6\text{mim}][\text{FAP}]$

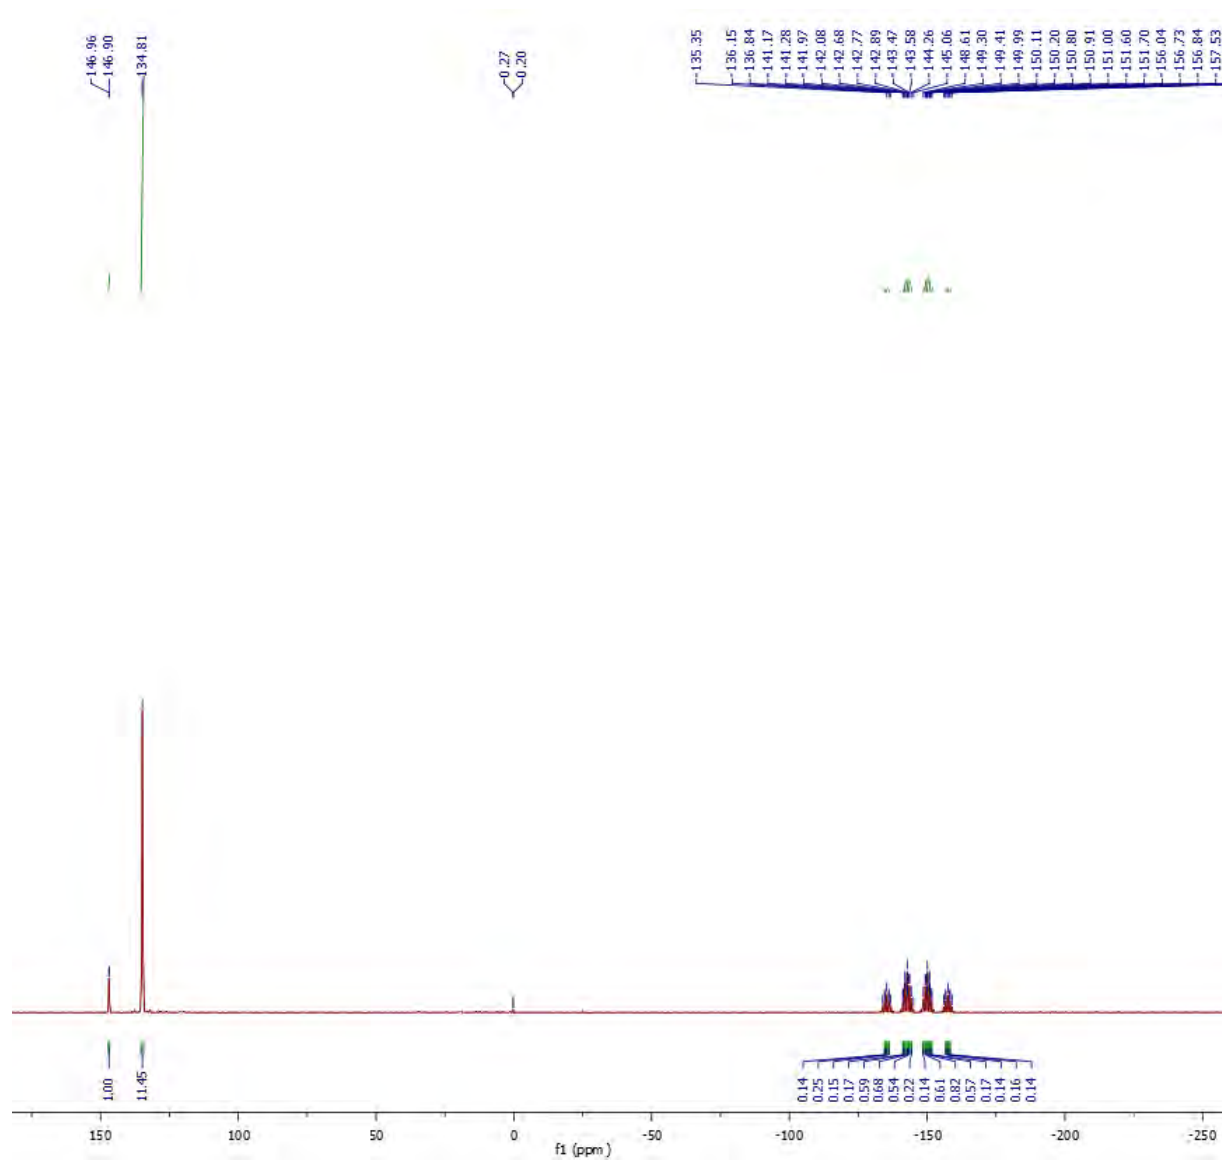

**Figure S3**  $^{31}\text{P}$  NMR of phosphorodiamidite, **3**, stabilized in  $[\text{C}_6\text{mim}][\text{FAP}]$

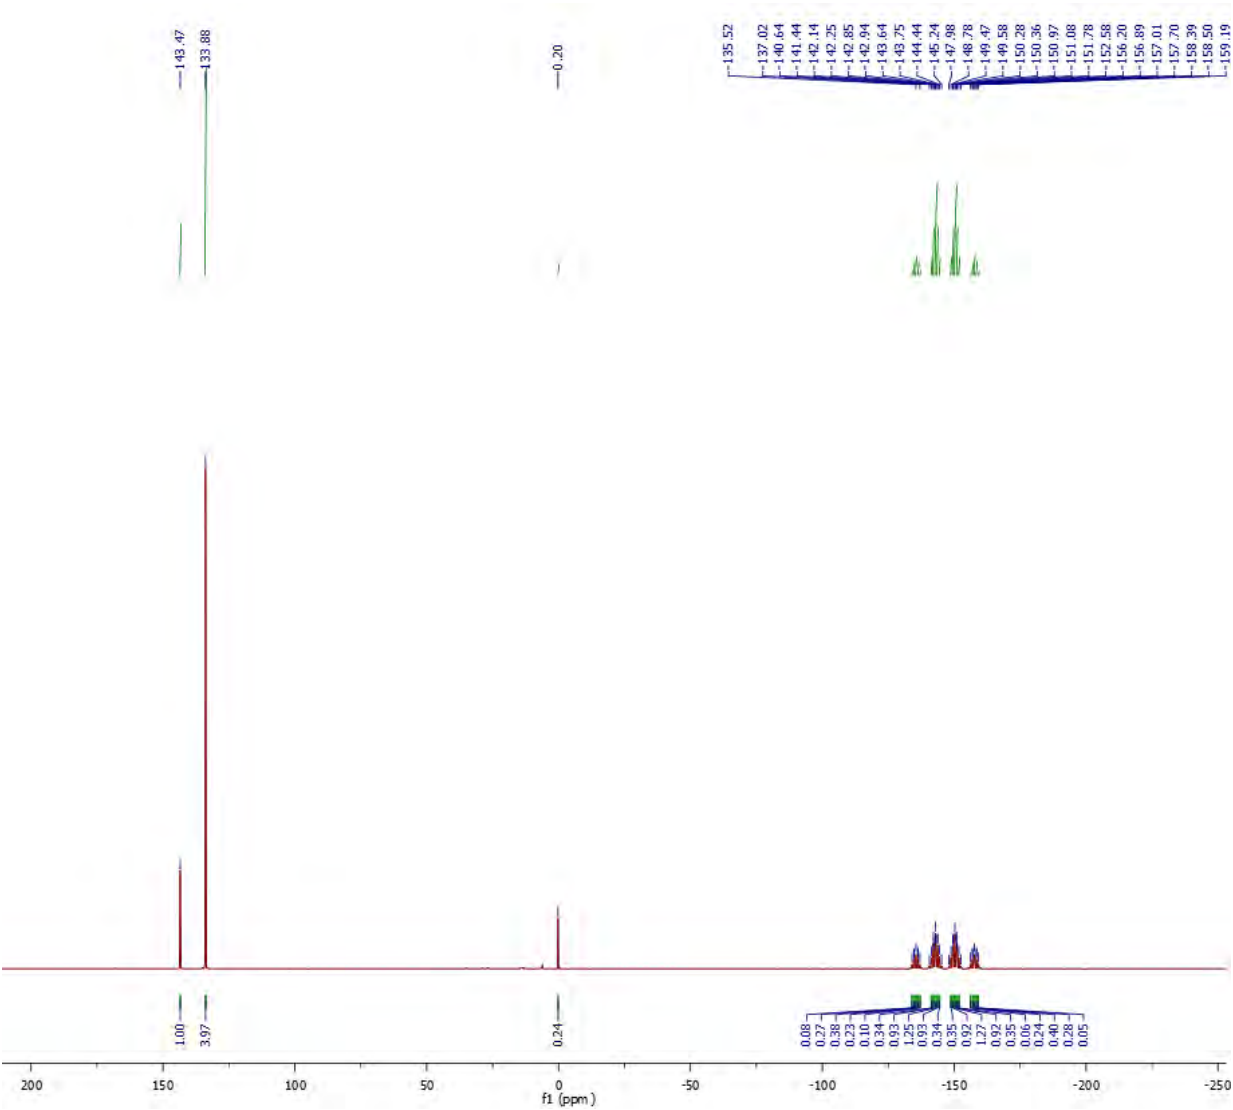

**Figure S4** (a)  $^1\text{H}$ , (b)  $^{13}\text{C}$  and (c)  $^{31}\text{P}$  NMR of phosphoramidite, **4**, as well as (d)  $^{31}\text{P}$  NMR of phosphoramidite, **4**, stabilized in  $[\text{C}_6\text{mim}][\text{FAP}]$

(a)

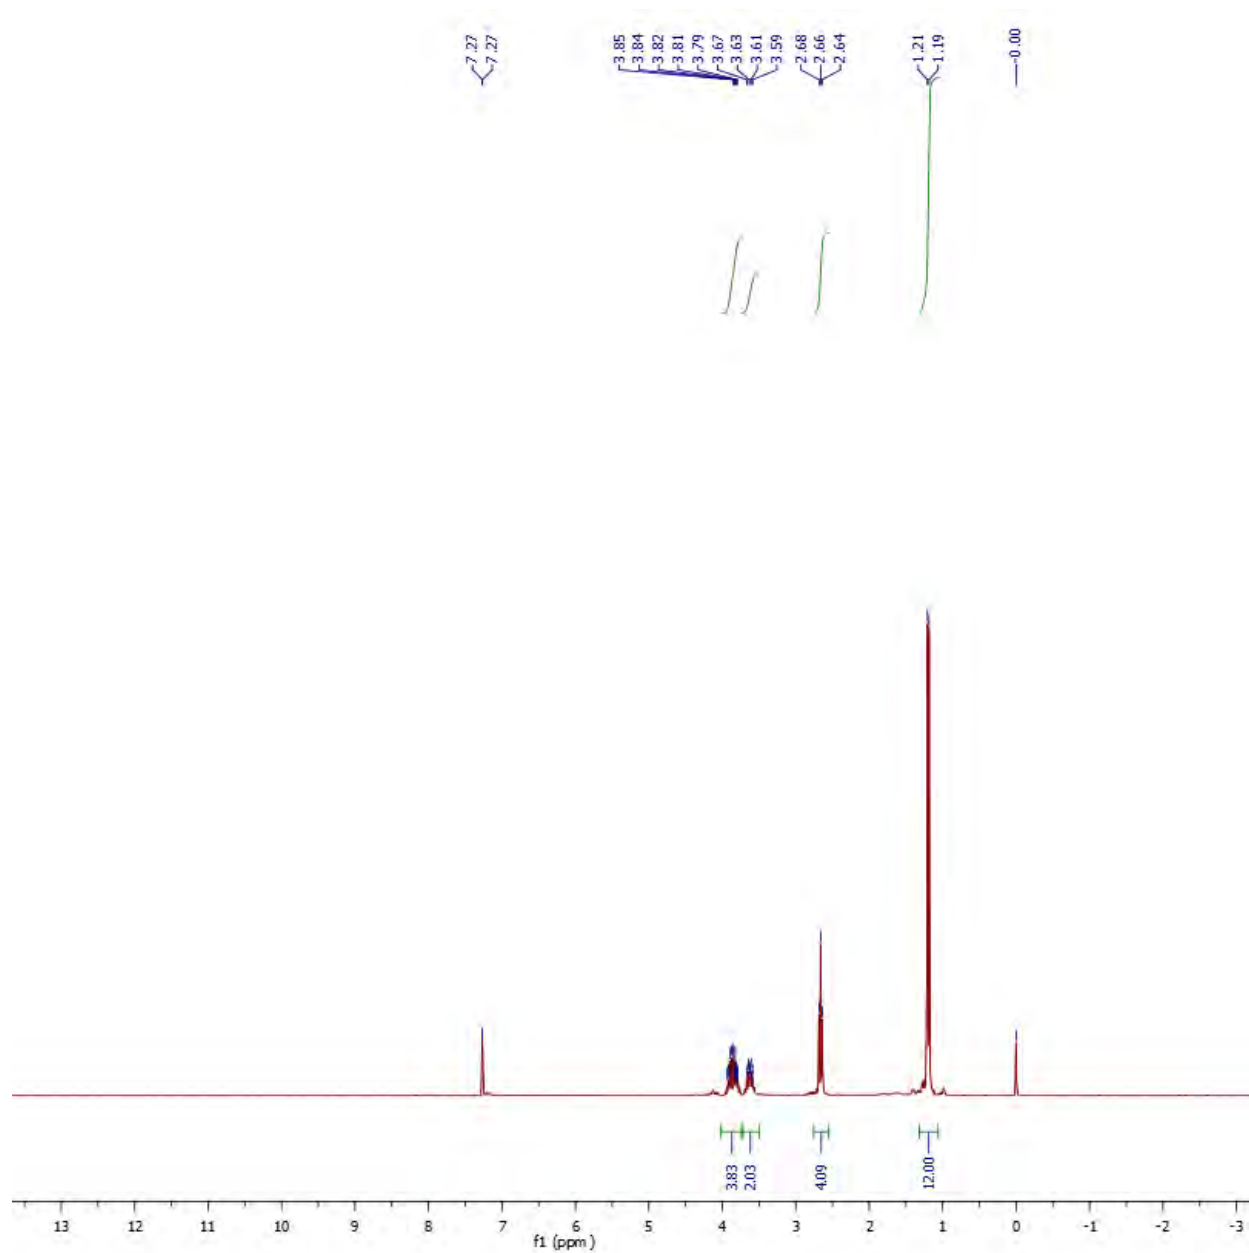

(b)

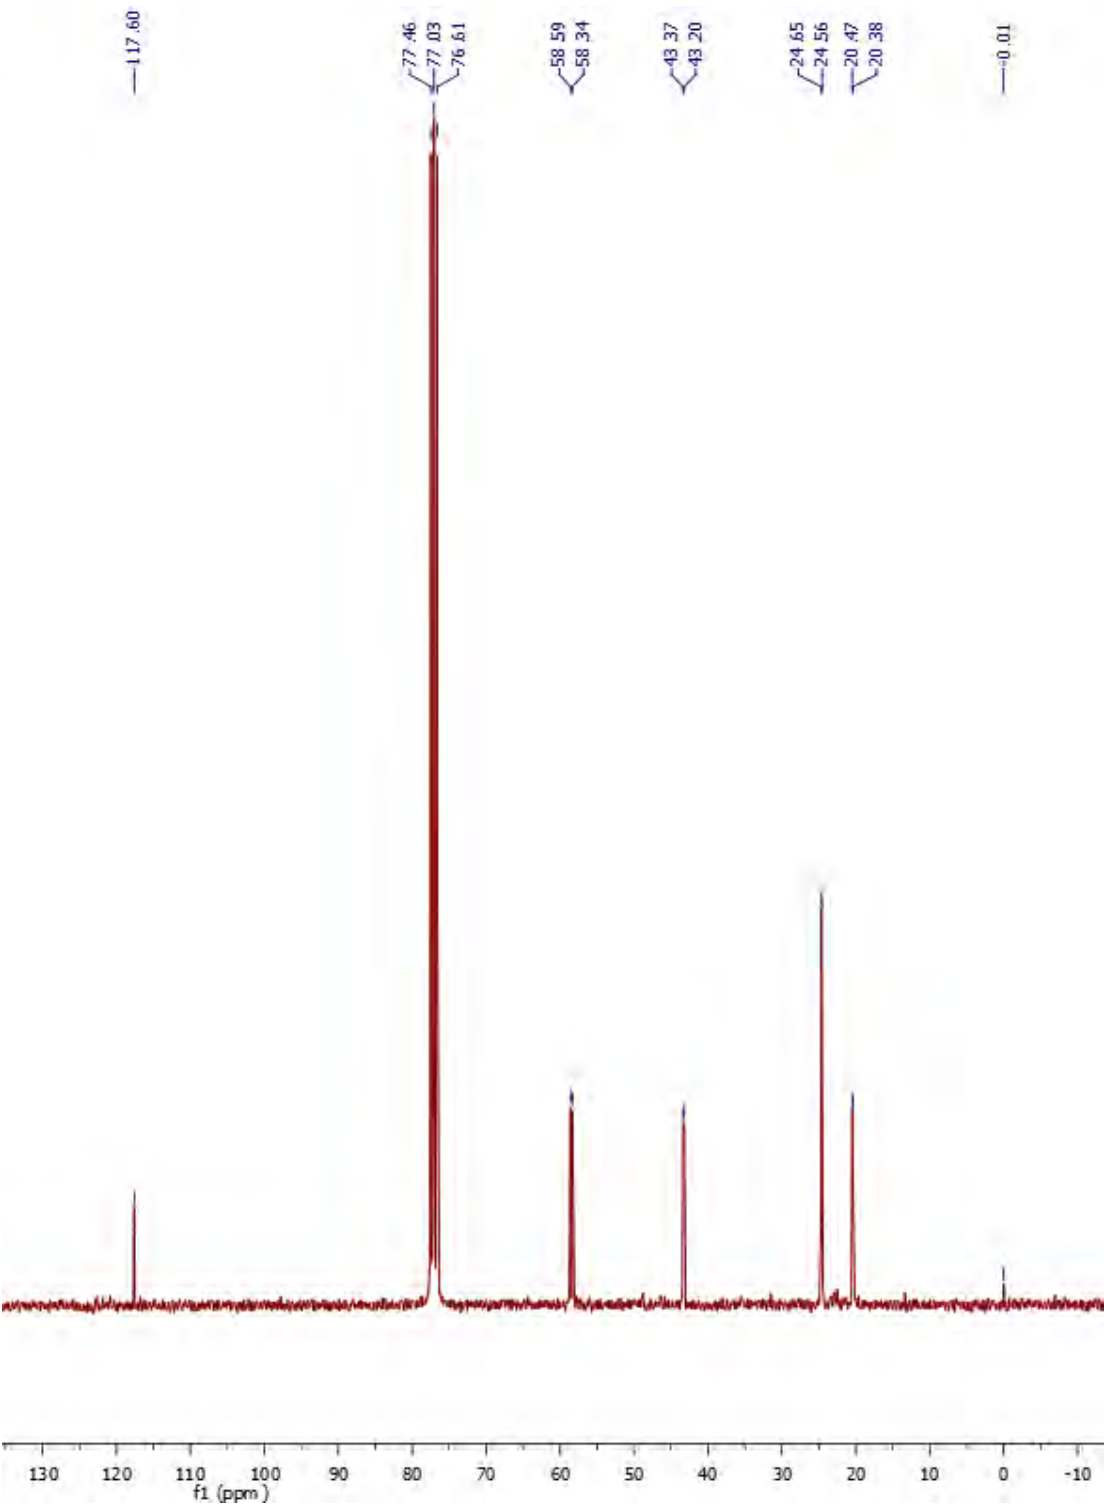



(c)

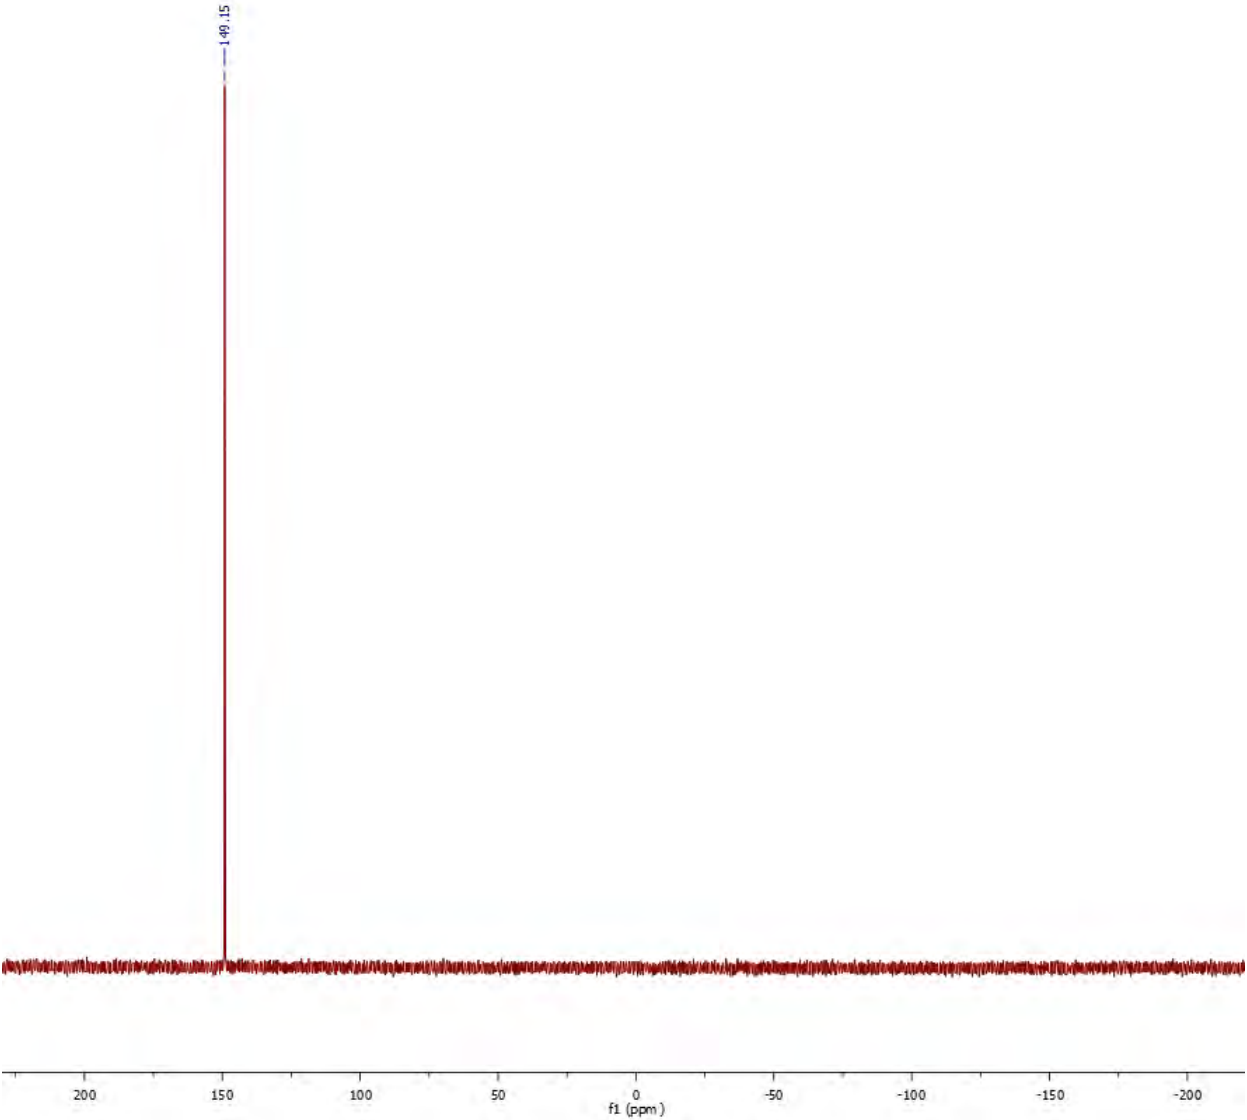

(d)

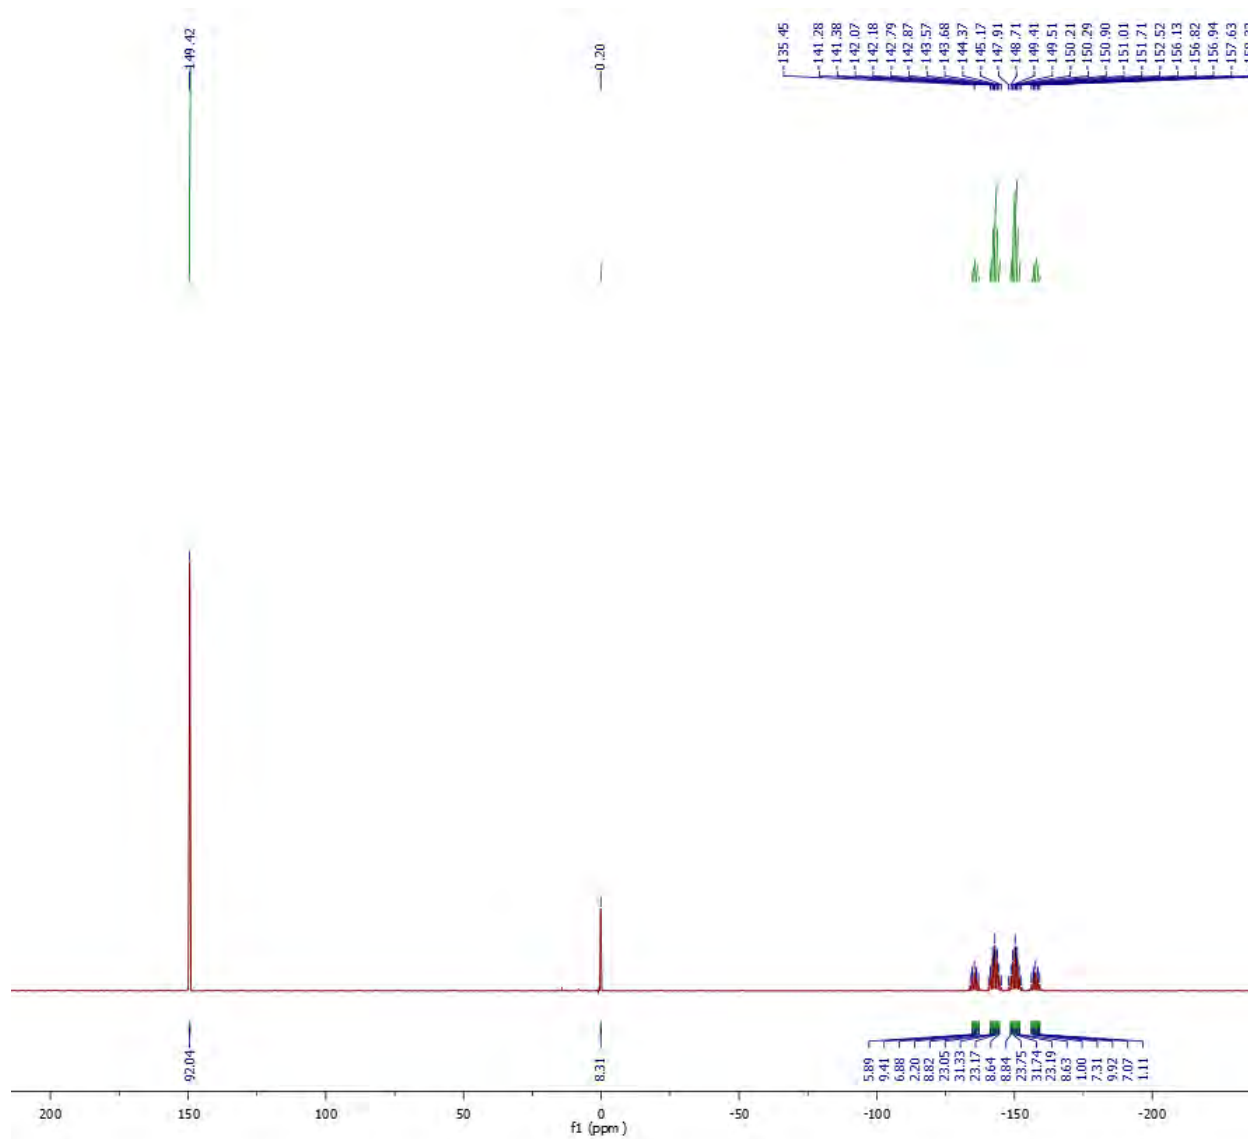

## Phosphitylation Reactions

All ball mill reactions were carried out on a 40 mg scale based on the amount of protected nucleoside. This generally equated to 25-30 mg (2.5 eq) of activator and 100  $\mu$ L of the [C<sub>6</sub>mim][FAP] stabilized phosphorodiamidites (2 eq).

## Activator Synthesis

### *N*-Methylimidazole Triflate

In a 2 neck round bottom flask, N-methylimidazole (1 eq) in DCM (10 ml) was added. The solution was stirred at room temperature for 30 min after which triflic acid was added (1.1 eq). Diethyl ether (10 ml) was then added to the solution to crystallise the salt and the mixture stirred for a further 30 min. The solution was filtered, the solid washed with diethyl ether, collected and dried under high vacuum for 2 h to give 1.75g (75%) of *N*-methylimidazole triflate as a white solid.

**<sup>1</sup>H NMR** (300 MHz, CD<sub>3</sub>OD) δ ppm 3.99 (s, 3H, NCH<sub>3</sub>), 7.59 (d, 2H, *J*= 7.2 Hz, NCHCHN), 8.99 (s, 1H, NCHN). **<sup>13</sup>C NMR** (75 MHz, CD<sub>3</sub>OD) δ ppm 35.4, 118.0, 122.9, 134.7 **<sup>19</sup>F NMR** (CD<sub>3</sub>OD) δ ppm -78.9 (s, CF<sub>3</sub>). **CHNS Anal.** Calcd for C<sub>5</sub>H<sub>8</sub>F<sub>3</sub>N<sub>2</sub>O<sub>3</sub>S: C, 25.9; H, 3.0; N, 12.1; S, 13.8 Found: C, 25.8; H, 2.77; N, 12.1; S, 13.5. **HRMS** (ES) +ve calc. 83.0609 found 83.0610; -ve calc. 148.9520 found 148.9520

### Synthesis of Pyridinium Trifluoroacetate

Pyridine (1 eq) was placed in a 2 neck round bottom flask equipped with a magnetic stirrer and cooled in an ice-water bath to 0°C. 2 ml of water was added followed by slow addition of trifluoroacetic acid (1.1 eq) and the mixture was left to stir for a further 2 h. The mixture was then concentrated in vacuo at 70 °C. The resulting residue was then dried under high vacuum for 2 h to give 1.70 g (88%) of pyridinium trifluoroacetate as a white solid.

**<sup>1</sup>H NMR** (300 MHz, CDCl<sub>3</sub>) δ ppm 7.82-7.95 (m, 2H, 2 NCHCHCH), 8.35 (t, 1H, *J*= 7.8 Hz, NCHCHCH), 8.91 (d, 2H, *J*= 5.1 Hz, 2 NCH). **<sup>13</sup>C NMR** (75 MHz, CDCl<sub>3</sub>) δ ppm 118.5, 126.9, 143.3, 144.3, 162.5 (q, *J*=37.6 Hz, CF<sub>3</sub>). **<sup>19</sup>F NMR** (CDCl<sub>3</sub>) δ ppm -79.1 (s, CF<sub>3</sub>). **CHNS Anal.** Calcd for C<sub>7</sub>H<sub>6</sub>F<sub>3</sub>NO<sub>2</sub>: C, 43.5; H, 3.1; N, 7.3 Found: C, 41.5; H, 2.66; N, 6.9. **HRMS** (ES) +ve calc. 80.0500 found 80.0504 ; -ve calc. 112.9850 found 112.9846.

### Ball Milling

To the partially protected nucleoside (1 eq) was added the activator (2.5 eq) and [C<sub>6</sub>mim][FAP]-stabilized phosphorodiamidite in [C<sub>6</sub>mim][FAP] (2 eq). The mixture was shaken in a 1.5 ml steel vessel with a 5 mm diameter steel ball bearing in a Retsch MM400 mixer mill at 25Hz for 0.5 h. In bulk physical form, the ball-milled reactions were pastes.

All compounds are a diastereoisomeric mixture, hence the complex <sup>1</sup>H and <sup>13</sup>C spectra and 2 peaks in each of the <sup>31</sup>P NMR spectra. The diastereoisomeric ratio was determined from the <sup>31</sup>P NMR.

***N*-Isobutyryl-5'-*O*-(4,4'-dimethoxytrityl)-2'-*O*-TBDMS-guanosine-3'-*O*-[*O*-(2-cyanoethyl)-*N*-morpholinophosphoramidite (1a).** Purification was achieved via filtration of the crude residue through

a short pad of silica gel (1:1 hexane: ethyl acetate, (1% NEt<sub>3</sub>), to give **1a** as a white solid (1:1 diastereotopic mixture).

**<sup>1</sup>H NMR** (400 MHz, CDCl<sub>3</sub>) δ ppm -0.21 (s, 3H, SiCH<sub>3</sub>), -0.17 (s, 3H, SiCH<sub>3</sub>), -0.04 (s, 3H, SiCH<sub>3</sub>), 0.03 (s, 3H, SiCH<sub>3</sub>), 0.60 (d, 3H, *J*= 6.9 Hz, CH<sub>3</sub>), 0.75 (d, 3H, *J*=6.9 Hz, CH<sub>3</sub>), 0.79 (s, 9H, SiC(CH<sub>3</sub>)<sub>3</sub>), 0.81 (s, 9H, SiC(CH<sub>3</sub>)<sub>3</sub>), 0.84 (d, 3H, *J*= 6.8 Hz, CH<sub>3</sub>), 0.92 (d, 3H, *J*= 6.8 Hz, CH<sub>3</sub>), 1.65-1.68 (heptet, 1H, *J*= 6.8 Hz, CH), 1.84-1.89 (heptet, 1H, *J*= 6.8 Hz, CH), 2.74 (t, 2H, *J*= 6.1 Hz OCH<sub>2</sub>CH<sub>2</sub>CN), 2.97 (m, 6H, OCH<sub>2</sub>CH<sub>2</sub>CN, NCH<sub>2</sub>CH<sub>2</sub>O), 3.02-3.11 (m, 6H, NCH<sub>2</sub>CH<sub>2</sub>O, H-5), 3.41-3.49 (m, 4H, NCH<sub>2</sub>CH<sub>2</sub>O, H-5), 3.61-3.64 (m, 6H, NCH<sub>2</sub>CH<sub>2</sub>O, H-5), 3.88-4.00 (m, 2H, OCH<sub>2</sub>CH<sub>2</sub>CN), 4.06-4.12 (m, 2H, OCH<sub>2</sub>CH<sub>2</sub>CN), 3.77 (s, 3H, OMe), 3.77 (s, 3H, OMe), 3.78 (s, 3H, OMe), 3.78 (s, 3H, OMe), 4.16 (br. m, 1H, H-4), 4.29 (br. m, 1H, H-4), 4.36 (dd, 1H, *J*= 12.0 Hz, *J*= 4.9 Hz, H-3), 4.44 (m, 1H, H-3), 4.99 (dd, 1H, *J*= 7.8 Hz, *J*= 5.0 Hz, H-2), 5.15 (dd, 1H, *J*= 7.2 Hz, *J*= 5.5 Hz, H-2), 5.74 (d, 1H, *J*= 7.3 Hz, H-1), 5.85 (d, 1H, *J*= 7.8 Hz, H-1), 6.80-6.85 (m, 8H, trityl), 7.23 (s, 1H, NH), 7.24 (s, 1H, NH), 7.24-7.31 (m, 6H, trityl), 7.40-7.45 (m, 8H, trityl), 7.56 (d, 2H, *J*= 7.3 Hz, trityl), 7.59 (d, 2H, *J*= 7.2 Hz, trityl), 7.83 (s, 1H, N=CH-N), 7.88 (s, 1H, N=CH-N), 8.00 (s, 1H, NH), 8.52 (s, 1H, NH). **<sup>13</sup>C NMR** (125 MHz, CDCl<sub>3</sub>) δ ppm -5.09, -5.08 (SiCH<sub>3</sub>), -4.65, -4.77 (SiCH<sub>3</sub>), 18.2-18.3 (SiC(CH<sub>3</sub>)<sub>3</sub>), 18.3-18.4 (SiC(CH<sub>3</sub>)<sub>3</sub>), 20.1-20.2 (OCH<sub>2</sub>CH<sub>2</sub>CN), 22.2 (Si-C-(CH<sub>3</sub>)<sub>3</sub>), 25.5-25.6 (CHCH<sub>3</sub>), 35.9-36.0 (CHCH<sub>3</sub>), 43.1-43.4 (NCH<sub>2</sub>CH<sub>2</sub>O), 55.1-55.2 (OCH<sub>3</sub>), 57.6-57.7, 58.9-59.0 (OCH<sub>2</sub>CH<sub>2</sub>CN), 63.1 (C-5), 67.8-67.9 (NCH<sub>2</sub>CH<sub>2</sub>O), 72.2-72.3, 72.8-72.9 (C-3), 73.5-73.6 (C-2), 84.3-84.4 (C-4), 87.4 (C-1), 113.3-113.4 (trityl), 117.1, 117.7 (CN), 122.1-148.5 (trityl), 138.2 (N=CH-N), 155.6, 158.8, 178.4 (C=O), 178.7 (C=O). **<sup>31</sup>P NMR** (121 MHz, CDCl<sub>3</sub>) δ ppm 145.0, 145.3. **HRMS** (ES, M- CH<sub>3</sub>) calculated for C<sub>47</sub>H<sub>59</sub>N<sub>7</sub>O<sub>10</sub>SiP 940.3830, found 940.3830.

***N*-Benzoyl-5'-*O*-(4,4'-dimethoxytrityl)-2'-deoxycytidine-3'-*O*-[*O*-(2-cyanoethyl)-*N*-**

**morpholinophosphoramidite (1b).** Purification was achieved via filtration of the crude residue through a short pad of silica gel (3:7 pentane: ethyl acetate, (1% NEt<sub>3</sub>), to give **1b** as a white solid (1:0.7 diastereotopic mixture).

**<sup>1</sup>H NMR** (400 MHz, CDCl<sub>3</sub>) δ ppm 2.23-2.35 (m, 2H, H-2), 2.50 (t, 2H, *J*= 6.2 Hz, OCH<sub>2</sub>CH<sub>2</sub>CN), 2.59-2.79 (m, 2H, H-2), 2.62 (t, 2H, *J*= 6.0 Hz, OCH<sub>2</sub>CH<sub>2</sub>CN), 3.02-3.03 (m, 4H, NCH<sub>2</sub>CH<sub>2</sub>O), 3.09-3.12 (m, 4H, NCH<sub>2</sub>CH<sub>2</sub>O), 3.38-3.46 (m, 2H, H-5), 3.50-3.53 (m, 4H, NCH<sub>2</sub>CH<sub>2</sub>O), 3.50-3.61 (m, 2H, H-5), 3.56-3.61 (m, 4H, NCH<sub>2</sub>CH<sub>2</sub>O), 3.69-3.83 (m, 4H, OCH<sub>2</sub>CH<sub>2</sub>CN), 3.80 (s, 3H, OCH<sub>3</sub>), 3.80 (s, 3H, OCH<sub>3</sub>), 3.81 (s, 3H, OCH<sub>3</sub>), 3.81 (s, 3H, OCH<sub>3</sub>), 4.09-4.13 (m, 1H, H-4), 4.16-4.20 (m, 1H, H-4), 4.50-4.53 (m, 1H, H-3), 4.64-4.69 (m, 1H, H-3), 6.21-6.26 (m, 2H, H-1), 6.86-6.89 (m, 8H, trityl), 7.23-7.25 (m, 16H, trityl, N-CH=CH), 7.41-7.42 (m, 4H, trityl), 7.48-7.53 (m, 4H, benzoyl), 7.59-7.64 (m, 2H, benzoyl),

7.86-7.88 (m, 4H, benzoyl), 8.32-8.43 (m, 2H, N-CH=CH), 8.68 (br s, 2H, NH).  $^{13}\text{C}$  NMR (125 MHz,  $\text{CDCl}_3$ )  $\delta$  ppm 20.2-20.3 ( $\text{OCH}_2\text{CH}_2\text{CN}$ ), 41.7 (C-2), 43.3 (d,  $J=15.8$  Hz,  $\text{NCH}_2\text{CH}_2\text{O}$ ), 43.4 (d,  $J=16.1$  Hz,  $\text{NCH}_2\text{CH}_2\text{O}$ ), 55.2-55.3 ( $\text{OCH}_3$ ), 58.4-58.5 ( $\text{OCH}_2\text{CH}_2\text{CN}$ ), 60.4 (C-5), 67.8-67.9 ( $\text{NCH}_2\text{CH}_2\text{O}$ ), 70.7 (C-3), 85.4-85.5 (C-4), 87.1 (C-1), 96.9 (N-CH=CH), 113.1 (trityl), 117.5 (CN), 122.1, 123.5, 127.2 (benzoyl), 127.5, 128.1, 130.1, 135.1 (trityl), 129.0 (benzoyl), 133.3 (benzoyl), 135.2 (N-CH=CH), 143.9, 144.0 (N-CH=CH), 158.7 (C=O), 162.2 (C=N).  $^{31}\text{P}$  NMR (121 MHz,  $\text{CDCl}_3$ )  $\delta$  ppm 144.4, 144.6. HRMS (ES,  $\text{M}+\text{H}^+$ ) calculated for  $\text{C}_{44}\text{H}_{47}\text{N}_5\text{O}_9\text{P}$  820.3111, found 820.3123

***N*-Benzoyl-5'-*O*-(4,4'-dimethoxytrityl)-2'-deoxyadenosine-3'-*O*-[*O*-(2-cyanoethyl)-*N*-**

**morpholinophosphoramidite (1c).** Purification was achieved via filtration of the crude residue through a short pad of silica gel (3:7 pentane: ethyl acetate, (1%  $\text{NEt}_3$ ), to give **1c** as a white solid (2:1 diastereotopic mixture).

$^1\text{H}$  NMR (400 MHz,  $\text{CDCl}_3$ )  $\delta$  ppm 2.52 (t,  $J=6.2$  Hz, 2H,  $\text{OCH}_2\text{CH}_2\text{CN}$ ), 2.55-2.65 (m, 2H, H-2), 2.63 (t,  $J=6.2$  Hz, 2H,  $\text{OCH}_2\text{CH}_2\text{CN}$ ), 2.87-2.98 (m, 2H, H-2), 3.14-3.20 (m, 8H,  $\text{NCH}_2\text{CH}_2\text{O}$ ), 3.34-3.46 (m, 4H, H-5), 3.54-3.56 (m, 4H,  $\text{NCH}_2\text{CH}_2\text{O}$ ), 3.60-3.62 (m, 4H,  $\text{NCH}_2\text{CH}_2\text{O}$ ), 3.77 (s, 12H,  $\text{OCH}_3$ ), 3.76-3.80 (m, 2H,  $\text{OCH}_2\text{CH}_2\text{CN}$ ), 3.87-3.91 (m, 2H,  $\text{OCH}_2\text{CH}_2\text{CN}$ ), 4.11-4.16 (m, 1H, H-4), 4.28-4.31 (m, 1H, H-4), 4.72-4.75 (m, 1H, H-3), 4.84-4.86 (m, 1H, H-3), 6.48-6.52 (m, 2H, H-1), 6.79-6.81 (m, 8H, trityl), 7.19-7.29 (m, 14H, trityl), 7.38-7.39 (m, 4H, trityl), 7.53 (t,  $J=7.5$  Hz, 4H, benzoyl), 7.62 (t,  $J=6.9$  Hz, 2H, benzoyl), 8.01 (t,  $J=7.4$  Hz, 4H, benzoyl), 8.16 (s, 1H, N-CH=N), 8.21 (s, 1H, N-CH=N), 8.72 (br s, 2H, N=CH-N), 9.01 (br s, 2H, NH).  $^{13}\text{C}$  NMR (125 MHz,  $\text{CDCl}_3$ )  $\delta$  ppm 20.2-20.4 ( $\text{OCH}_2\text{CH}_2\text{CN}$ ), 39.3-39.3 (C-2), 43.3-43.5 ( $\text{NCH}_2\text{CH}_2\text{O}$ ), 55.2 ( $\text{OCH}_3$ ), 58.4-58.6 ( $\text{OCH}_2\text{CH}_2\text{CN}$ ), 63.0-63.6 (C-5), 67.6-67.9 ( $\text{NCH}_2\text{CH}_2\text{O}$ ), 73.5-74.0 (C-3), 84.6-84.8 (C-1), 85.6-86.0 (C-4), 113.1 (trityl), 117.4 (CN), 123.4, 126.9-130.0 (trityl, benzoyl), 132.9 (benzoyl), 141.6-141.7 (N-CH=N), 149.3, 152.5 (N=CH-H), 158.6, 164.7 (C=O).  $^{31}\text{P}$  NMR (121 MHz,  $\text{CDCl}_3$ )  $\delta$  ppm 144.2, 144.4. HRMS (ES,  $\text{M}+\text{H}^+$ ) calculated for  $\text{C}_{45}\text{H}_{47}\text{N}_7\text{O}_8\text{P}$  844.3324, found 844.3215

***N*-Isobutyryl-5'-*O*-(4,4'-dimethoxytrityl)-2'-*O*-TBDMS-guanosine-3'-*O*-[*O*-(2-cyanoethyl)-*N,N'*-**

**ethylmethylphosphoramidite (2a).** Purification was achieved via filtration of the crude residue through a short pad of silica gel (1:1 hexane: ethyl acetate, (1%  $\text{NEt}_3$ ), to give **2a** as a white solid (0.8:1 diastereotopic mixture).

$^1\text{H}$  NMR (400 MHz,  $\text{CDCl}_3$ )  $\delta$  ppm -0.21 (s, 3H,  $\text{SiCH}_3$ ), -0.17 (s, 3H,  $\text{SiCH}_3$ ), -0.04 (s, 3H,  $\text{SiCH}_3$ ), 0.03 (s, 3H,  $\text{SiCH}_3$ ), 0.52 (d, 6H,  $J=6.7$  Hz,  $\text{CH}_3$ ), 0.73 (d, 6H,  $J=6.8$  Hz,  $\text{CH}_3$ ), 0.70 (s, 9H,  $\text{SiC}(\text{CH}_3)_3$ ), 0.80 (s, 9H,  $\text{SiC}(\text{CH}_3)_3$ ), 1.05-1.29 (m, 8H,  $\text{NCH}_2\text{CH}_3$ ,  $\text{CHCH}_3$ ), 2.42 (d, 3H,  $J=6.8$  Hz,  $\text{NCH}_3$ ), 2.56 (d, 3H,  $J=7.2$  Hz,  $\text{NCH}_3$ ), 2.60-2.77 (m, 4H,  $\text{OCH}_2\text{CH}_2\text{CN}$ ), 2.84-2.90 (m, 2H, H-5), 3.00-3.04 (m, 4H,

$\text{NCH}_2\text{CH}_3$ ), 3.52-3.65 (m, 2H, H-5), 3.76-3.96 (m, 16H,  $\text{OCH}_2\text{CH}_2\text{CN}$ ,  $\text{OCH}_3$ ), 4.07-4.16 (m, 2H, H-4), 4.27-4.45 (m, 2H, H-3), 4.97-5.20 (m, 2H, H-2), 5.72 (d, 1H,  $J = 7.3$  Hz, H-1), 5.86 (d, 1H,  $J = 7.8$  Hz, H-1), 6.79-6.84 (m, 8H, trityl), 7.23-7.63 (trityl, 20H, N-H), 7.80 (s, 1H,  $\text{NCH}=\text{N}$ ), 7.86 (s, 1H,  $\text{NCH}=\text{N}$ ), 11.9 (br. s, 2H, NH).  $^{13}\text{C}$  NMR (125 MHz,  $\text{CDCl}_3$ )  $\delta$  ppm -5.13, -5.29 ( $\text{SiCH}_3$ ), -4.77, -4.80 ( $\text{SiCH}_3$ ), 14.6-14.7 ( $\text{NCH}_2\text{CH}_3$ ), 14.7-14.8 ( $\text{NCH}_2\text{CH}_3$ ), 18.2-18.3 ( $\text{SiC}(\text{CH}_3)_3$ ), 18.3-18.4 ( $\text{SiC}(\text{CH}_3)_3$ ), 19.9-20.0, 20.1-20.2 ( $\text{OCH}_2\text{CH}_2\text{CN}$ ), 22.6 ( $\text{Si-C}(\text{CH}_3)_3$ ), 25.5-25.6 ( $\text{CH}_3$ ), 29.6-29.7, 30.1-30.2 ( $\text{NCH}_2\text{CH}_3$ ), 35.8 ( $\text{CH}$ ), 44.2-44.4 ( $\text{NCH}_3$ ), 55.3 ( $\text{OCH}_3$ ), 57.1-57.2, 58.7-58.8 ( $\text{OCH}_2\text{CH}_2\text{CN}$ ), 63.1-63.2 (C-5), 71.9-72.3 (C-3), 73.2, 75.0 (C-2), 84.5 (C-4), 87.3 (C-1), 113.1-113.3 (trityl), 117.2 ( $\text{NCC}=\text{O}$ ), 117.8 (CN), 129.9, 130.1, 135.4, 135.7, 136.2 (trityl), 138.2 ( $\text{NCH}=\text{N}$ ), 139.2, 144.8-148.4 (trityl), 155.6, 158.7, 178.2 (C=O), 178.7 (C=O).  $^{31}\text{P}$  NMR (121 MHz,  $\text{CDCl}_3$ )  $\delta$  ppm 147.8, 147.9. HRMS (ES,  $\text{M}+\text{H}^+$ ) calculated for  $\text{C}_{47}\text{H}_{62}\text{N}_7\text{O}_9\text{SiP}$  928.4194, found 928.4206

***N*-Benzoyl-5'-*O*-(4,4'-dimethoxytrityl)-2'-deoxycytidine-3'-*O*-[*O*-(2-cyanoethyl)-*N,N'*-ethylmethylphosphoramidite (**2b**).** Purification was achieved via filtration of the crude residue through a short pad of silica gel (1:1 hexane: ethyl acetate, (1%  $\text{NEt}_3$ ), to give **2b** as a white solid (0.7:1 diastereotopic mixture).

$^1\text{H}$  NMR (400 MHz,  $\text{CDCl}_3$ )  $\delta$  ppm 1.01-1.43 (m, 6H,  $\text{NCH}_2\text{CH}_3$ ), 2.28-2.67 (m, 12H, H-2,  $\text{NCH}_3$ ,  $\text{OCH}_2\text{CH}_2\text{CN}$ ), 2.89-3.04 (m, 6H, H-2,  $\text{NCH}_2\text{CH}_3$ ), 3.39-3.58 (m, 2H, H-5), 3.65-3.74 (m, 2H, H-5), 3.80 (br. s, 12H,  $\text{OCH}_3$ ), 3.94-4.02 (m, 4H,  $\text{OCH}_2\text{CH}_2\text{CN}$ ), 4.24-4.36 (m, 2H, H-4), 4.64-4.70 (m, 2H, H-3), 6.17-6.24 (m, 2H, H-1), 6.86-6.87 (m, 8H, trityl), 7.20-7.40 (m, 20H, trityl,  $\text{N-CH}=\text{CH}$ ), 7.52-7.54 (m, 4H, benzoyl), 7.61-7.64 (m, 2H, benzoyl), 7.85-7.87 (m, 4H, benzoyl), 8.29 (br. m, 2H,  $\text{N-CH}=\text{CH}$ ), 8.40 (br. s, 2H, NH).  $^{13}\text{C}$  NMR (125 MHz,  $\text{CDCl}_3$ )  $\delta$  ppm 14.6 ( $\text{NCH}_3$ ), 20.1-20.3 ( $\text{OCH}_2\text{CH}_2\text{CN}$ ), 36.1 ( $\text{NCH}_2\text{CH}_3$ ), 40.6-40.8 (C-2), 43.4 ( $\text{NCH}_3$ ), 55.2, 55.5 ( $\text{OCH}_3$ ), 57.4-57.9, 58.0-58.1 ( $\text{OCH}_2\text{CH}_2\text{CN}$ ), 61.8 (C-5), 71.1-71.6 (C-3), 85.1-85.7 (C-4), 86.9-87.0 (C-1), 97.1 ( $\text{N-CH}=\text{CH}$ ), 113.4 (trityl), 118.4 (CN), 122.1, 123.5, 127.4, 128.0, 128.1, 128.2, 129.1, 130.0, 130.1, 135.2 (trityl, benzoyl) 143.9-144.0 ( $\text{N-CH}=\text{CH}$ ), 158.7 (C=O), 158.8 (C=O).  $^{31}\text{P}$  NMR (121 MHz,  $\text{CDCl}_3$ )  $\delta$  ppm 147.2, 147.3. HRMS (ES,  $\text{M}+\text{H}^+$ ) calculated for  $\text{C}_{43}\text{H}_{47}\text{N}_5\text{O}_8\text{P}$  792.3162, found 792.3126

***N*-Benzoyl-5'-*O*-(4,4'-dimethoxytrityl)-2'-deoxyadenosine-3'-*O*-[*O*-(2-cyanoethyl)-*N,N'*-ethylmethylphosphoramidite (**2c**).** Purification was achieved via filtration of the crude residue through a short pad of silica gel (1:1 hexane: ethyl acetate, (1%  $\text{NEt}_3$ ), to give **2c** as a white solid (0.7:1 diastereotopic mixture).

$^1\text{H}$  NMR (400 MHz,  $\text{CDCl}_3$ )  $\delta$  ppm 1.04-1.37 (m, 6H,  $\text{NCH}_2\text{CH}_3$ ), 2.47-2.77 (m, 10H, H-2,  $\text{NCH}_3$ ,  $\text{OCH}_2\text{CH}_2\text{CN}$ ), 2.90-3.22 (m, 6H, H-2,  $\text{NCH}_2\text{CH}_3$ ), 3.31-3.47 (m, 4H, H-5), 3.68-3.78 (m, 4H,

OCH<sub>2</sub>CH<sub>2</sub>CN), 3.77 (s, 6H, OCH<sub>3</sub>), 3.78 (s, 6H, OCH<sub>3</sub>), 4.26-4.35 (m, 2H, H-4), 4.77-4.81 (m, 2H, H-3), 6.49-6.54 (m, 2H, H-1), 6.78-6.81 (m, 8H, trityl), 7.22-7.29 (m, 10H, trityl), 7.38-7.40 (m, 8H, trityl), 7.51-7.55 (m, 4H, benzoyl), 7.60-6.62 (m, 2H, benzoyl), 8.01-8.03 (m, 4H, benzoyl), 8.20-8.22, (m, 2H, N-CH=N), 8.73-8.74 (m, 2H, N=CH-N), 9.00 (br. s, 2H, NH). <sup>13</sup>C NMR (125 MHz, CDCl<sub>3</sub>) δ ppm 14.6-14.7 (NCH<sub>2</sub>CH<sub>3</sub>), 20.2-20.4 (OCH<sub>2</sub>CH<sub>2</sub>CN), 30.1-30.2 (NCH<sub>3</sub>), 39.4 (C-2), 42.3-42.4, 42.6-42.7 (NCH<sub>3</sub>), 55.2-55.3 (OCH<sub>3</sub>), 58.0-58.2 (OCH<sub>2</sub>CH<sub>2</sub>CN), 63.2-63.3 (C-5), 73.2-73.5 (C-3), 84.8-84.9 (C-1), 85.7-85.8 (C-4), 113.1 (trityl), 117.5 (CN), 122.1, 123.4, 126.9, 127.8, 127.9, 128.1, 130.1, 132.8, 133.6, 135.6 (trityl, benzoyl), 141.6 (N-CH=N), 144.1, 152.3 (N=CH-N), 158.6 (C=O). <sup>31</sup>P NMR (121 MHz, CDCl<sub>3</sub>) δ ppm 146.9, 147.0. HRMS (ES, M+H<sup>+</sup>) calculated for C<sub>43</sub>H<sub>47</sub>N<sub>7</sub>O<sub>7</sub>P 816.3275, found 792.3265

***N*-Isobutyryl-5'-*O*-(4,4'-dimethoxytrityl)-2'-*O*-TBDMS-guanosine-3'-*O*-[*O*,*O*-(2-cyanoethyl)-phosphoramidite (**4a**).** Purification was achieved via filtration of the crude residue through a short pad of silica gel 1:1 hexane: ethyl acetate, (1% NEt<sub>3</sub>), to give **4a** as a white solid.

<sup>1</sup>H NMR (400 MHz, CDCl<sub>3</sub>) δ ppm -0.21 (s, 3H, SiCH<sub>3</sub>), -0.01 (s, 3H, SiCH<sub>3</sub>), 0.80 (s, 9H, CH<sub>3</sub>), 0.85 (d, J= 6.9 Hz, 3H, CH<sub>3</sub>), 0.98 (d, J= 6.8 Hz, 3H, CH<sub>3</sub>), 1.84-1.88 (m, 1H, CH), 2.54 (t, J= 6.0 Hz, 2H, OCH<sub>2</sub>CH<sub>2</sub>CN), 2.72 (t, J= 6.4 Hz, 2H, OCH<sub>2</sub>CH<sub>2</sub>CN), 3.22-3.25 (m, 1H, H-5), 3.59-3.62 (m, 1H, H-5), 3.78 (s, 3H, OCH<sub>3</sub>), 3.79 (s, 3H, OCH<sub>3</sub>), 3.91-3.96 (m, 2H, OCH<sub>2</sub>CH<sub>2</sub>CN), 4.10-4.16 (m, 2H, OCH<sub>2</sub>CH<sub>2</sub>CN), 4.30-4.31 (m, 1H, H-4), 4.65 (ddd, J= 9.2, 4.8, 1.8 Hz 1H, H-3), 4.97 (dd, J= 7.1, 4.8 Hz, 1H, H-2), 5.87 (d, J= 7.2 Hz, 1H, H-1), 6.80-6.87 (m, 4H, trityl), 7.20-7.53 (m, 10H, trityl, NH), 7.93 (s, 1H, N=CH-N), 12.2 (s, 1H, NH). <sup>13</sup>C NMR (125 MHz, CDCl<sub>3</sub>) δ ppm -5.34 (SiCH<sub>3</sub>), -4.81 (SiCH<sub>3</sub>), 18.5 (SiC(CH<sub>3</sub>)<sub>3</sub>), 19.3, (SiC(CH<sub>3</sub>)<sub>3</sub>), 20.0 (d, J= 4.3 Hz, OCH<sub>2</sub>CH<sub>2</sub>CN), 20.2 (d, J= 4.3 Hz, OCH<sub>2</sub>CH<sub>2</sub>CN), 25.5 (CH<sub>3</sub>), 35.9 (CH), 55.4 (OCH<sub>3</sub>), 56.9 (d, J= 7.2 Hz, OCH<sub>2</sub>CH<sub>2</sub>CN), 57.2 (d, J= 7.2 Hz, OCH<sub>2</sub>CH<sub>2</sub>CN), 63.1 (C-5), 74.0 (d, J= 14.2 Hz, C-3), 75.1 (C-2), 83.9 (C-4), 86.6 (C), 87.6 (C-1), 113.5 (trityl), 117.2 (NCC=O), 117.6 (CN), 121.1, 122.1, 123.5, 127.8, 128.0, 128.4, 130.0, 135.3, 135.7 (trityl), 138.7 (N=CH-N), 144.8, 147.6, 148.9, 158.8, 179.2 (C=O). <sup>31</sup>P NMR (121 MHz, CDCl<sub>3</sub>) δ ppm 137.9. HRMS (ES, M+H<sup>+</sup>) calculated for C<sub>47</sub>H<sub>58</sub>N<sub>7</sub>O<sub>10</sub>NaSiP 962.3650, found 962.3672

The corresponding <sup>1</sup>H, <sup>13</sup>C and <sup>31</sup>P NMR spectra for **1a-c**, **2a-c** and **4a** are shown in Figure S5-S11. The <sup>31</sup>P NMR and <sup>1</sup>H NMR spectra of **3a** stabilized in [C<sub>6</sub>mim][FAP] is shown in Figure S12.

**Figure S5** (a)  $^1\text{H}$ , (b)  $^{13}\text{C}$  and (c)  $^{31}\text{P}$  NMR spectra of *N*-Isobutyryl-5'-*O*-(4,4'-dimethoxytrityl)-2'-*O*-TBDMS-guanosine-3'-*O*-[*O*-(2-cyanoethyl)-*N*-morpholinophosphoramidite (**1a**).

(a)

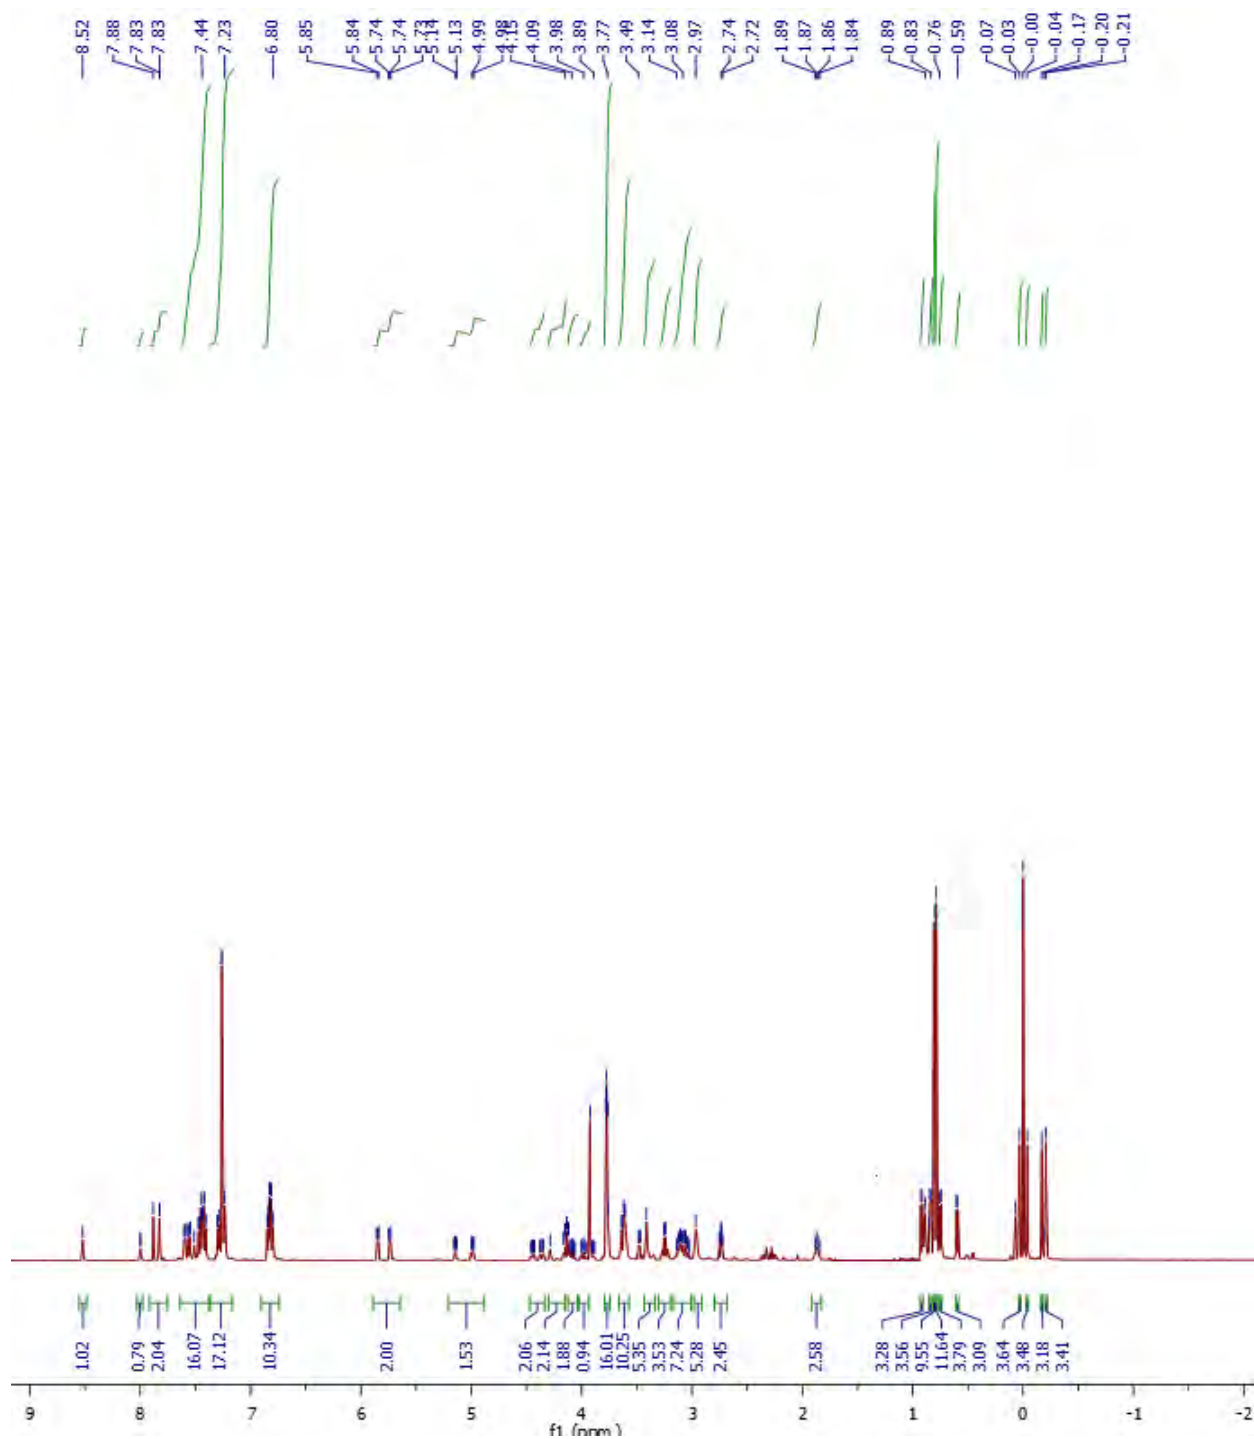



(b)

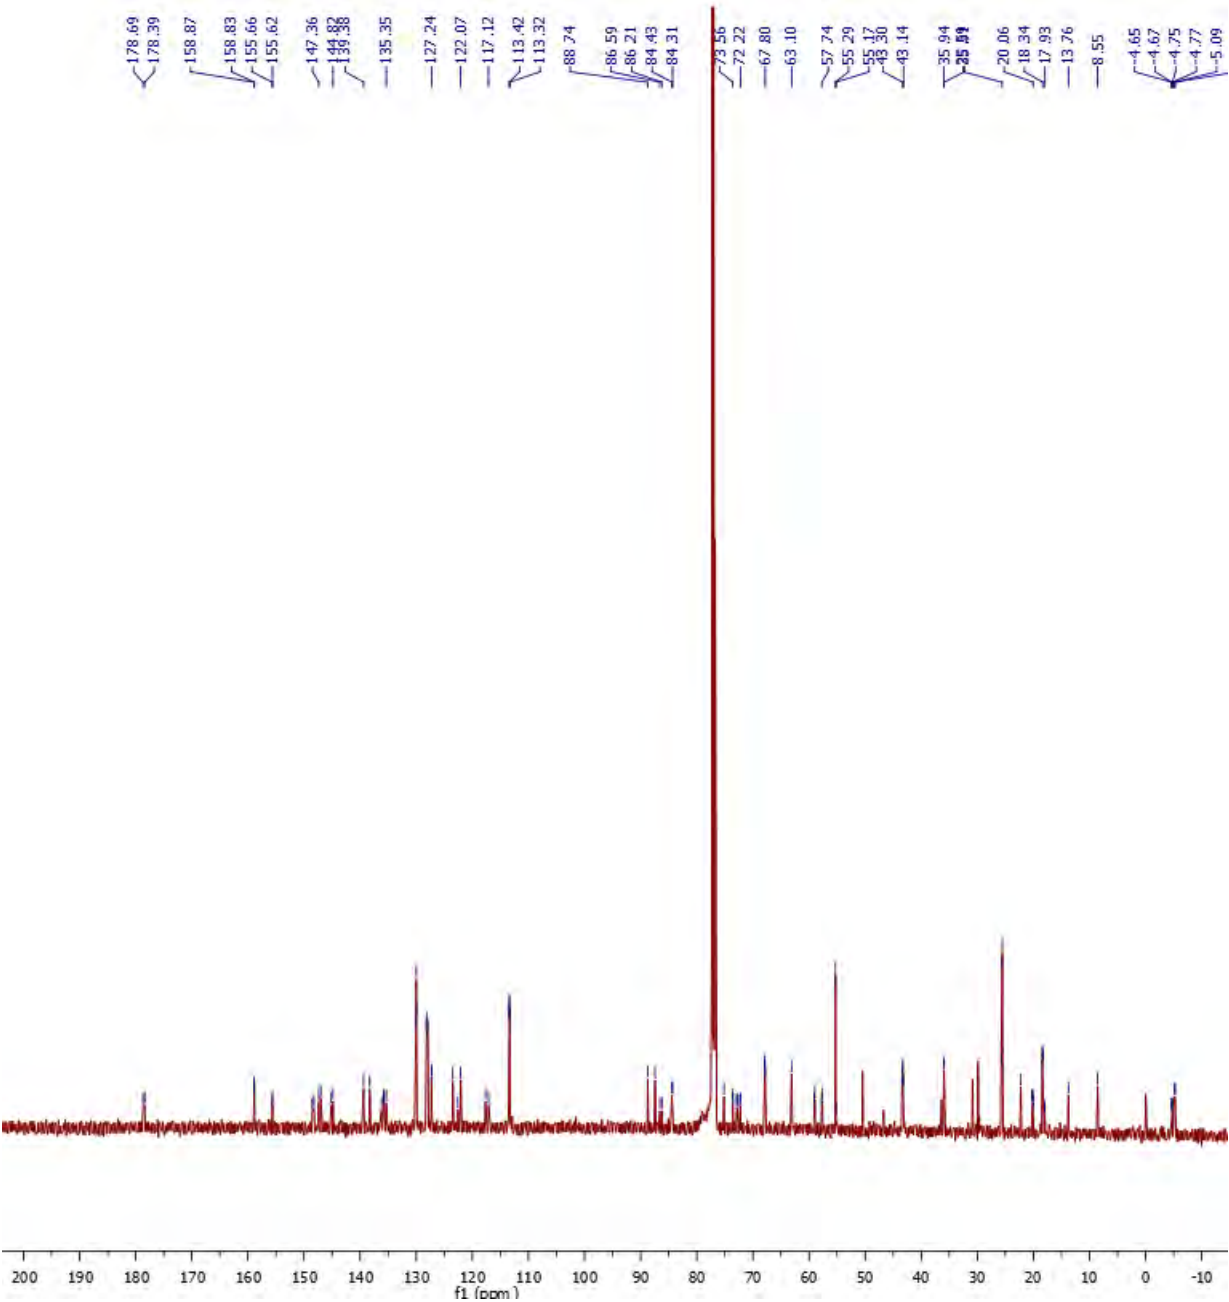

(c)

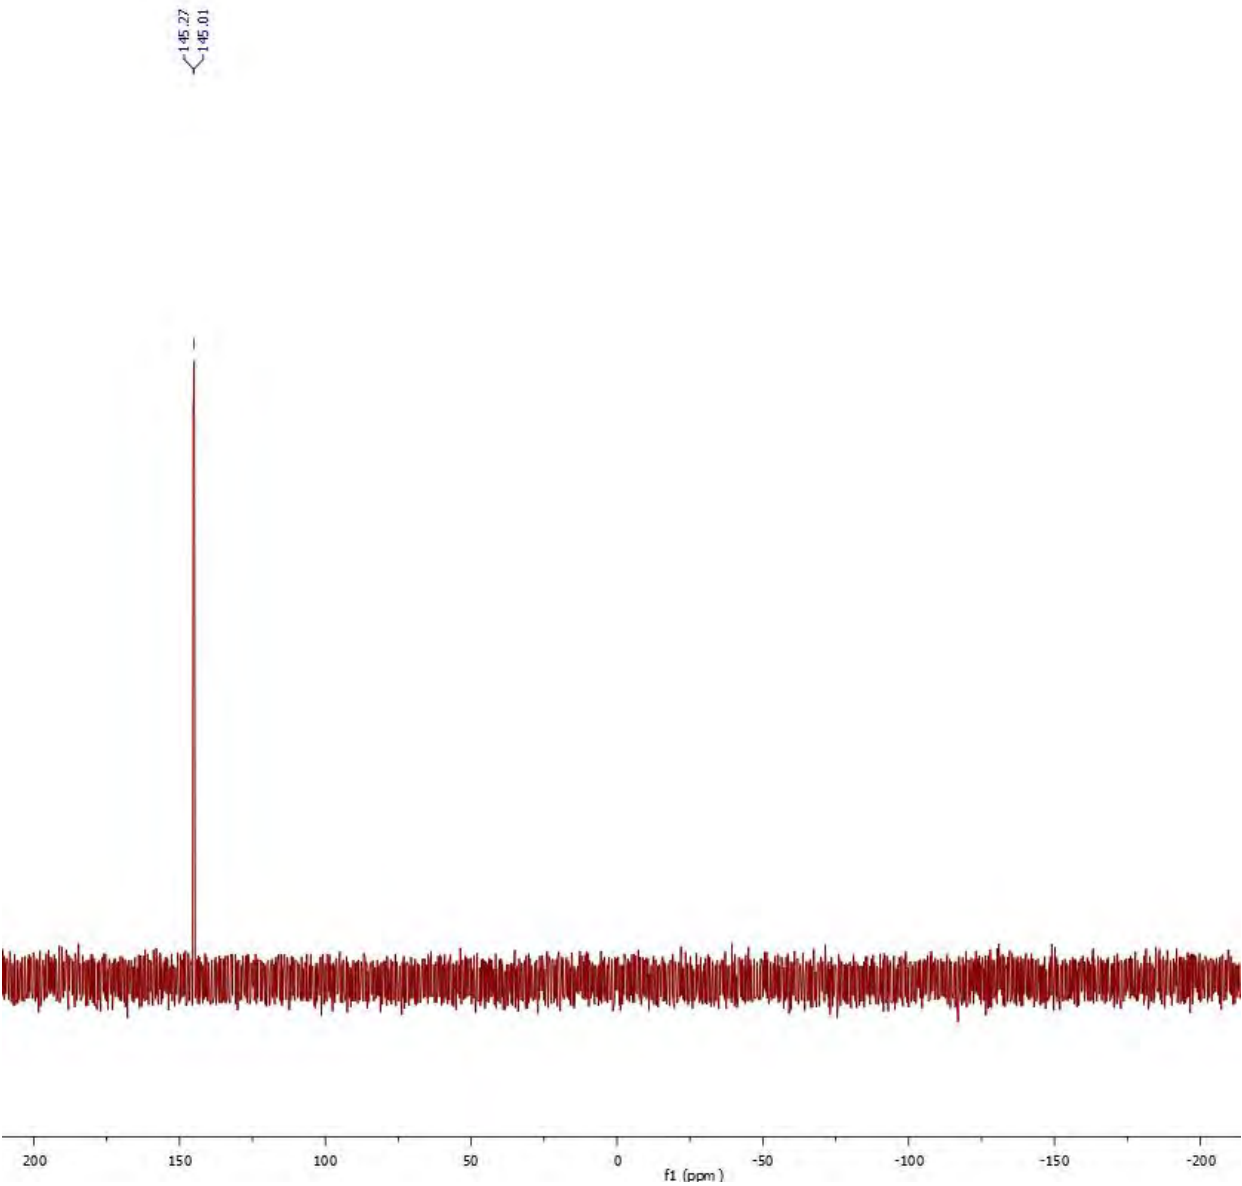

**Figure S6 (a)**  $^1\text{H}$ , (b)  $^{13}\text{C}$  and (c)  $^{31}\text{P}$  NMR spectra of *N*-Benzoyl-5'-*O*-(4,4'-dimethoxytrityl)-2'-deoxycytidine-3'-*O*-[*O*-(2-cyanoethyl)-*N*-morpholinophosphoramidite (**1b**).

(a)

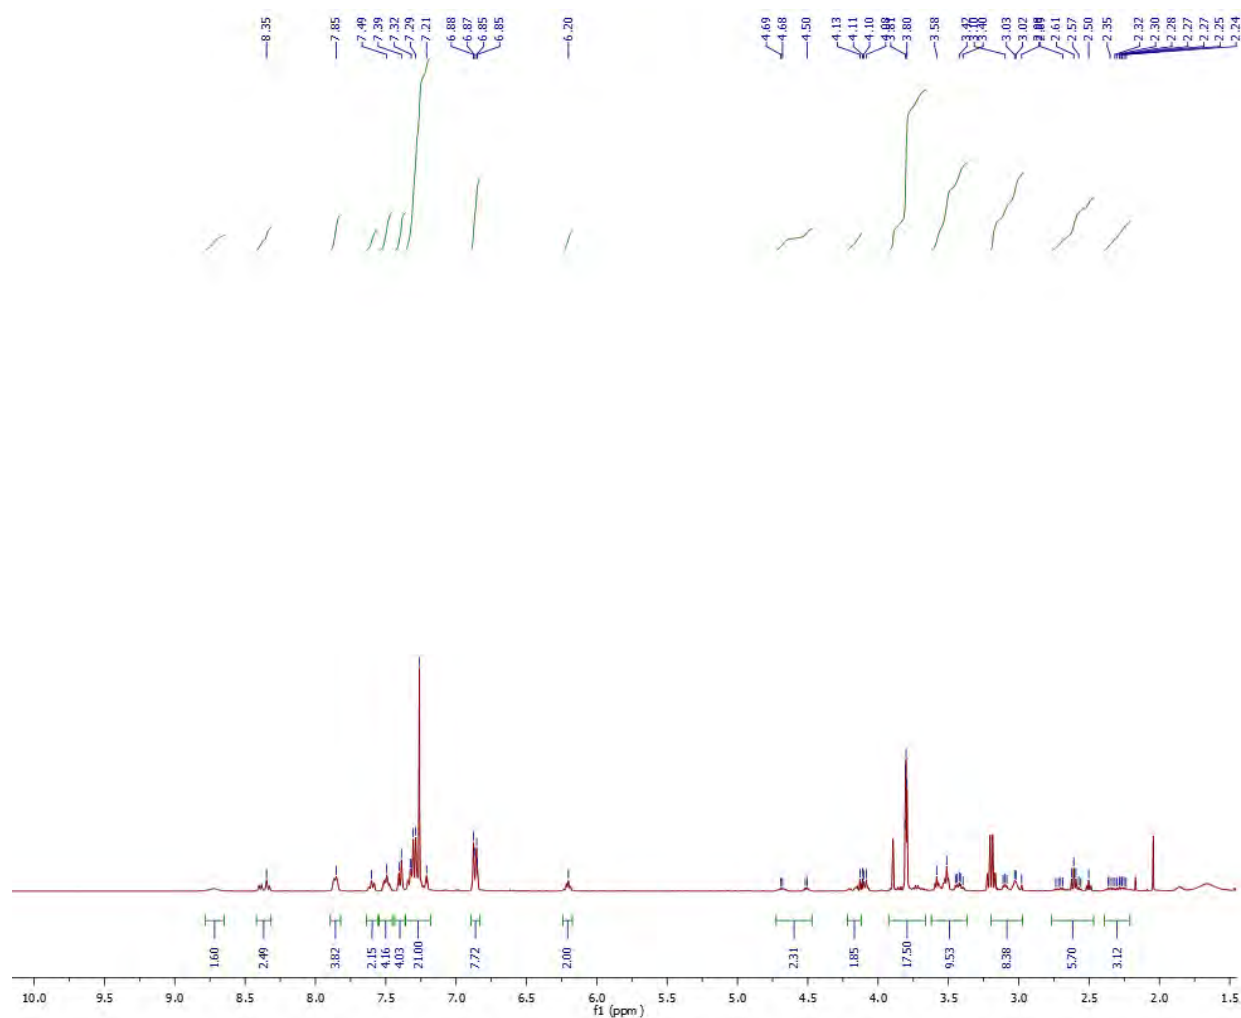

(b)

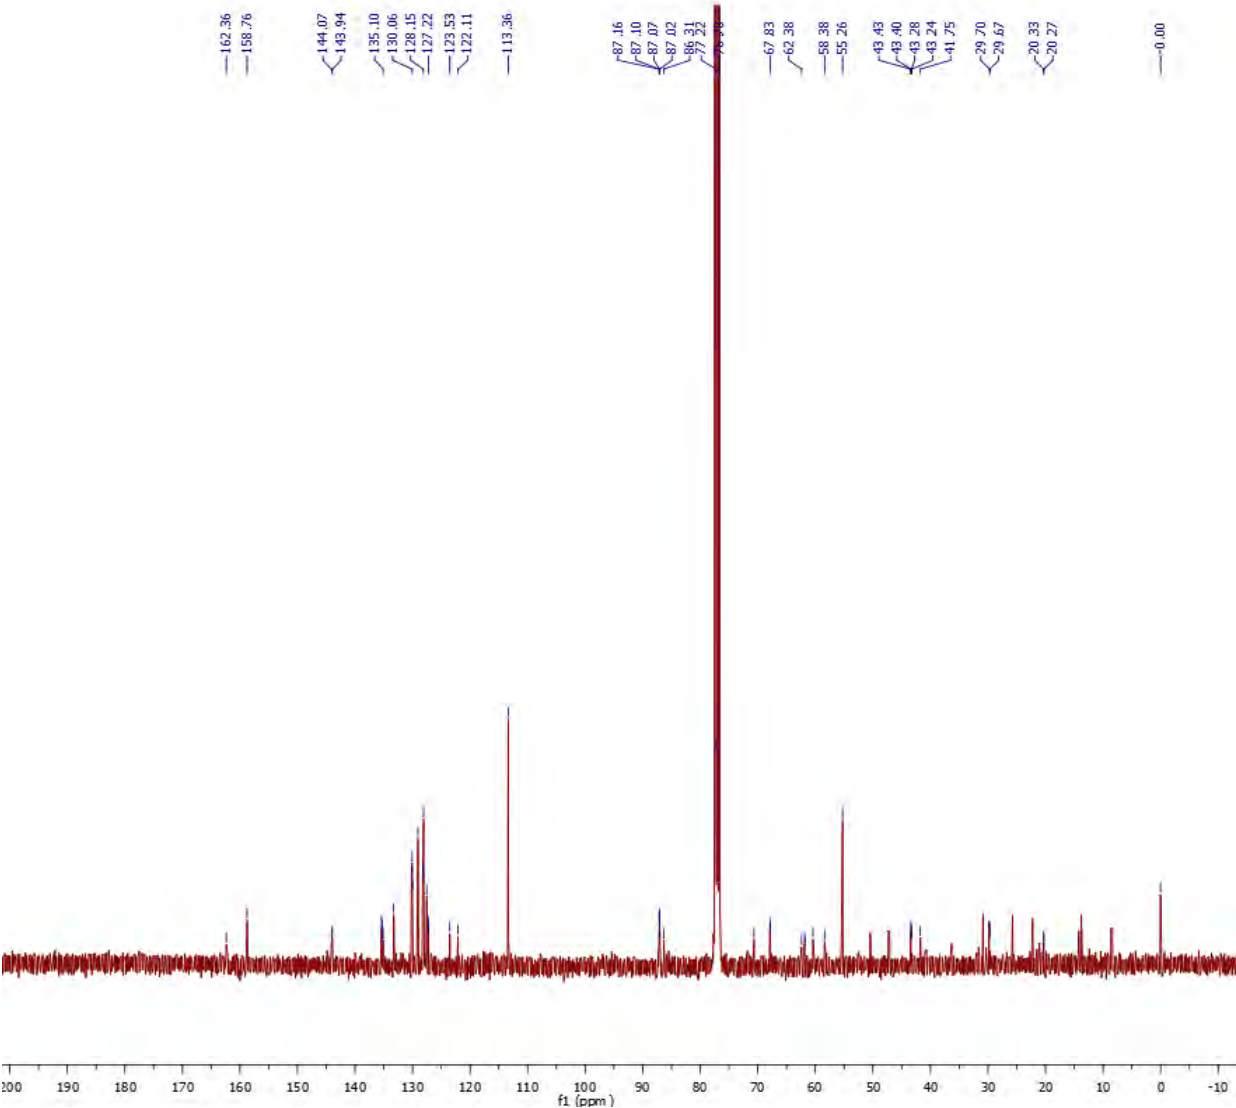

(c)

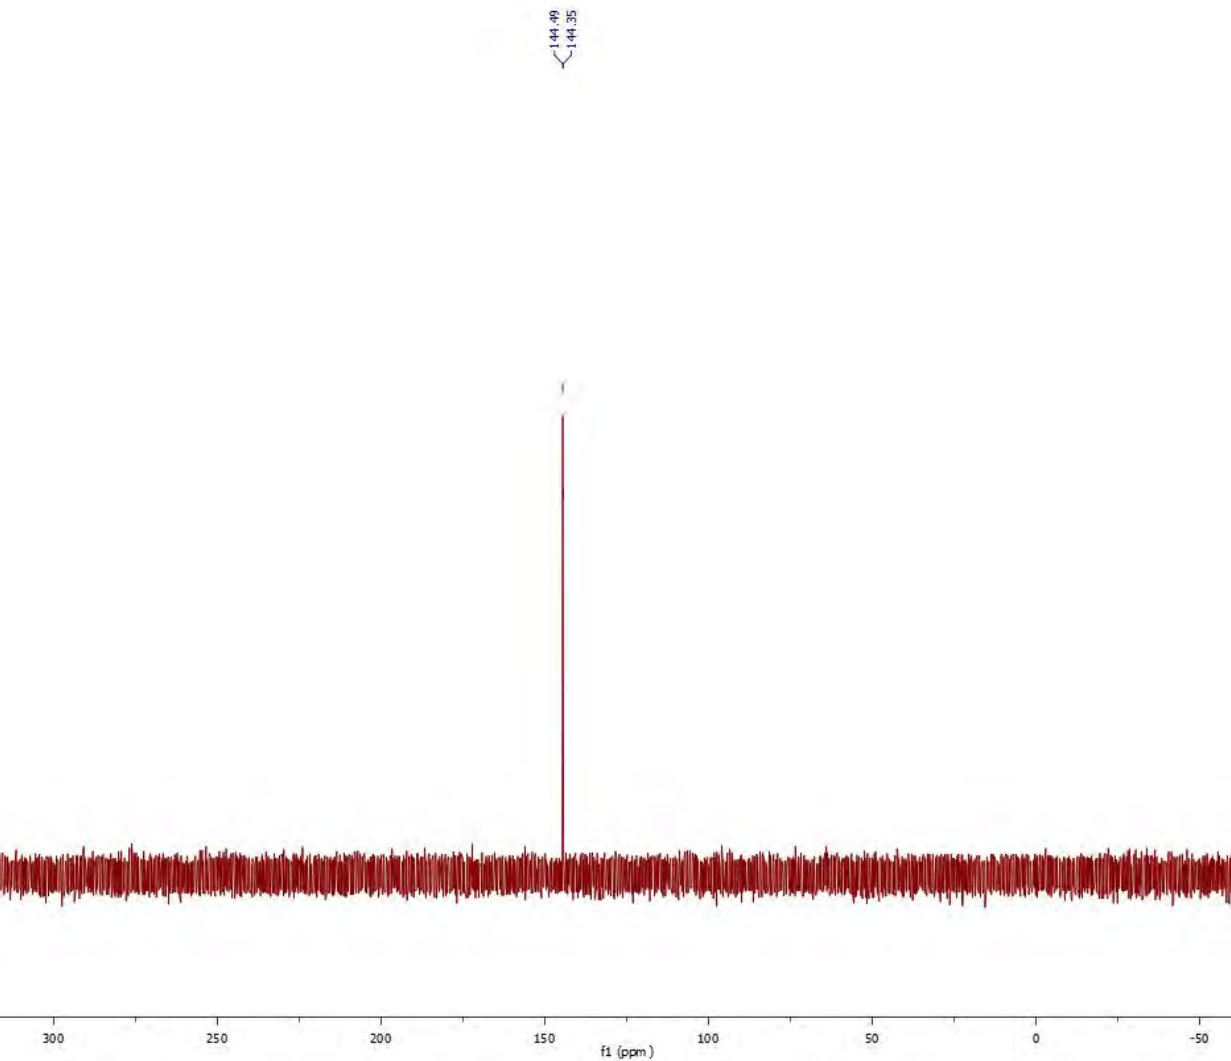

**Figure S7** (a)  $^1\text{H}$ , (b)  $^{13}\text{C}$  and (c)  $^{31}\text{P}$  NMR spectra of *N*-Benzoyl-5'-*O*-(4,4'-dimethoxytrityl)-2'-deoxyadenosine-3'-*O*-[*O*-(2-cyanoethyl)-*N*-morpholinophosphoramidite (**1c**).

(a)

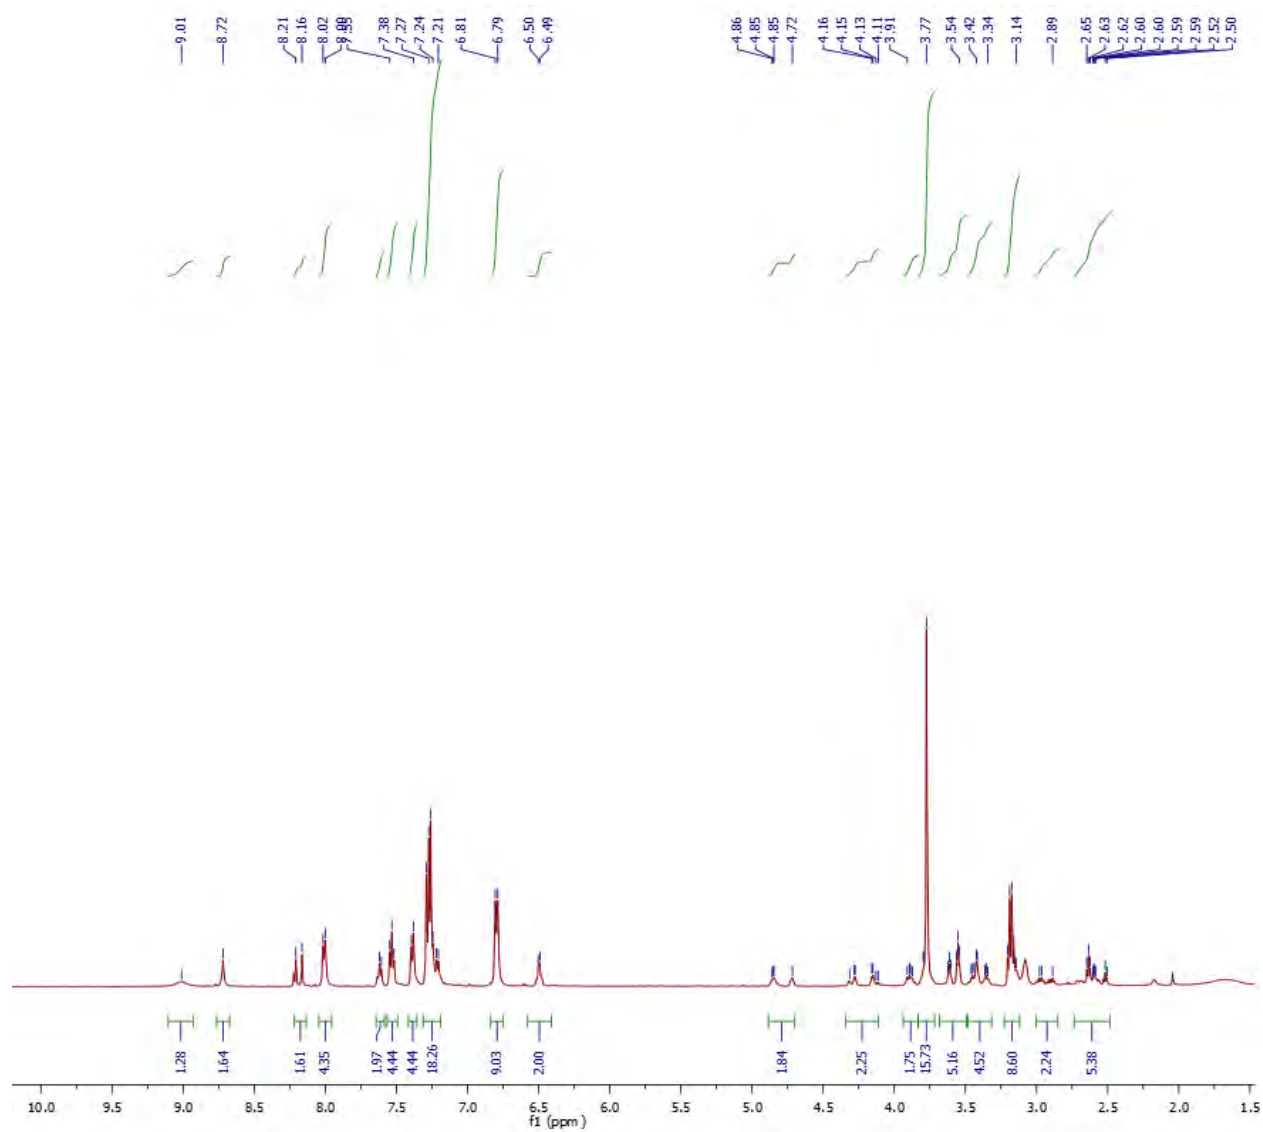

(b)

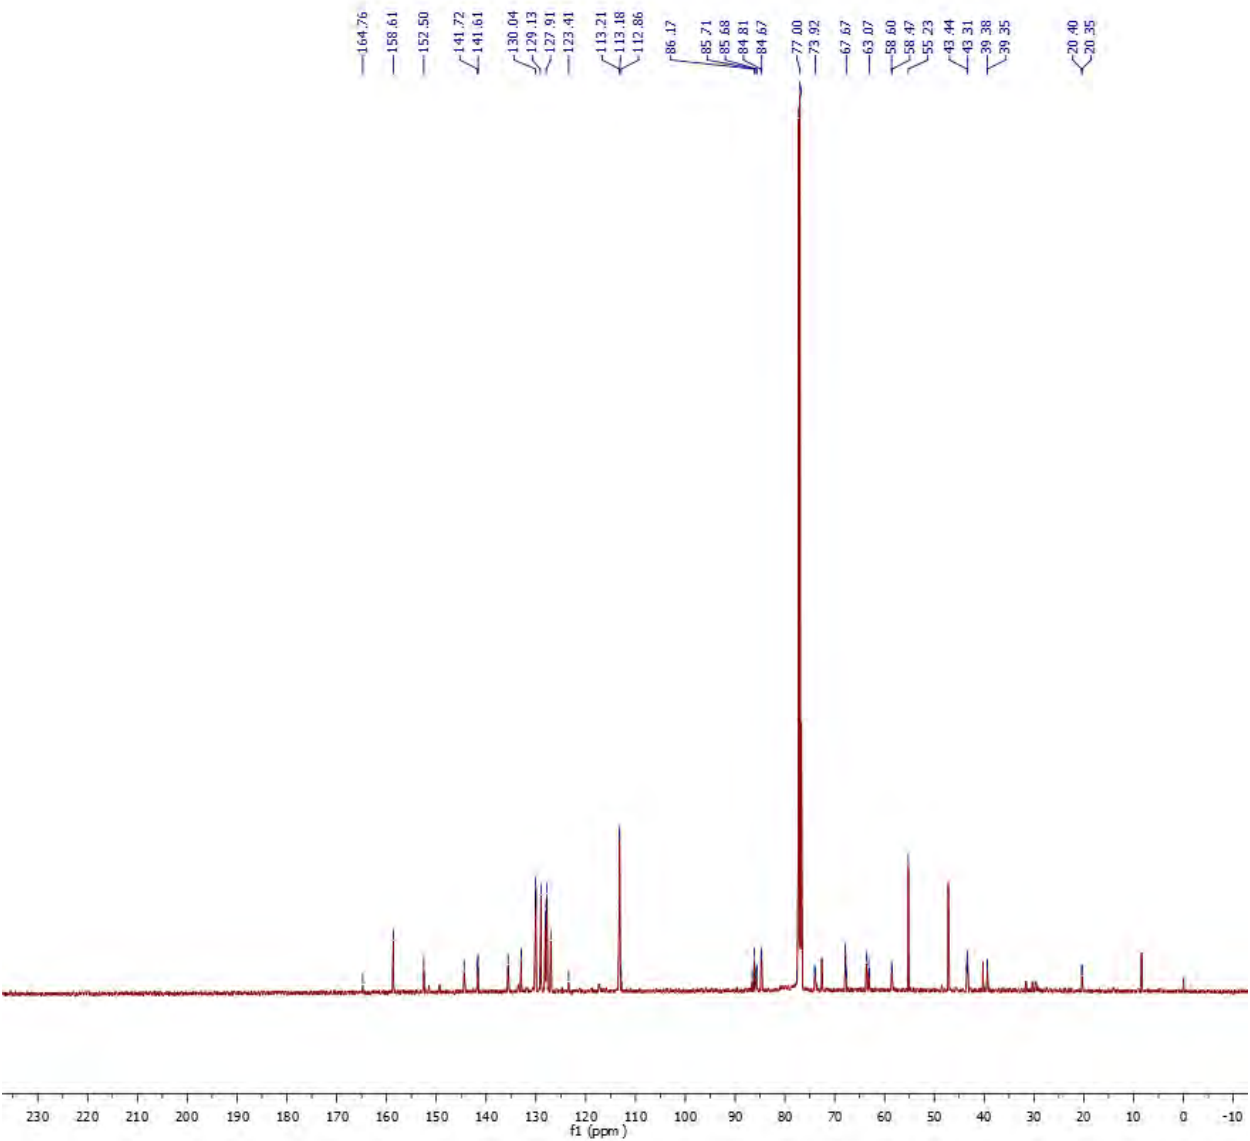

(c)

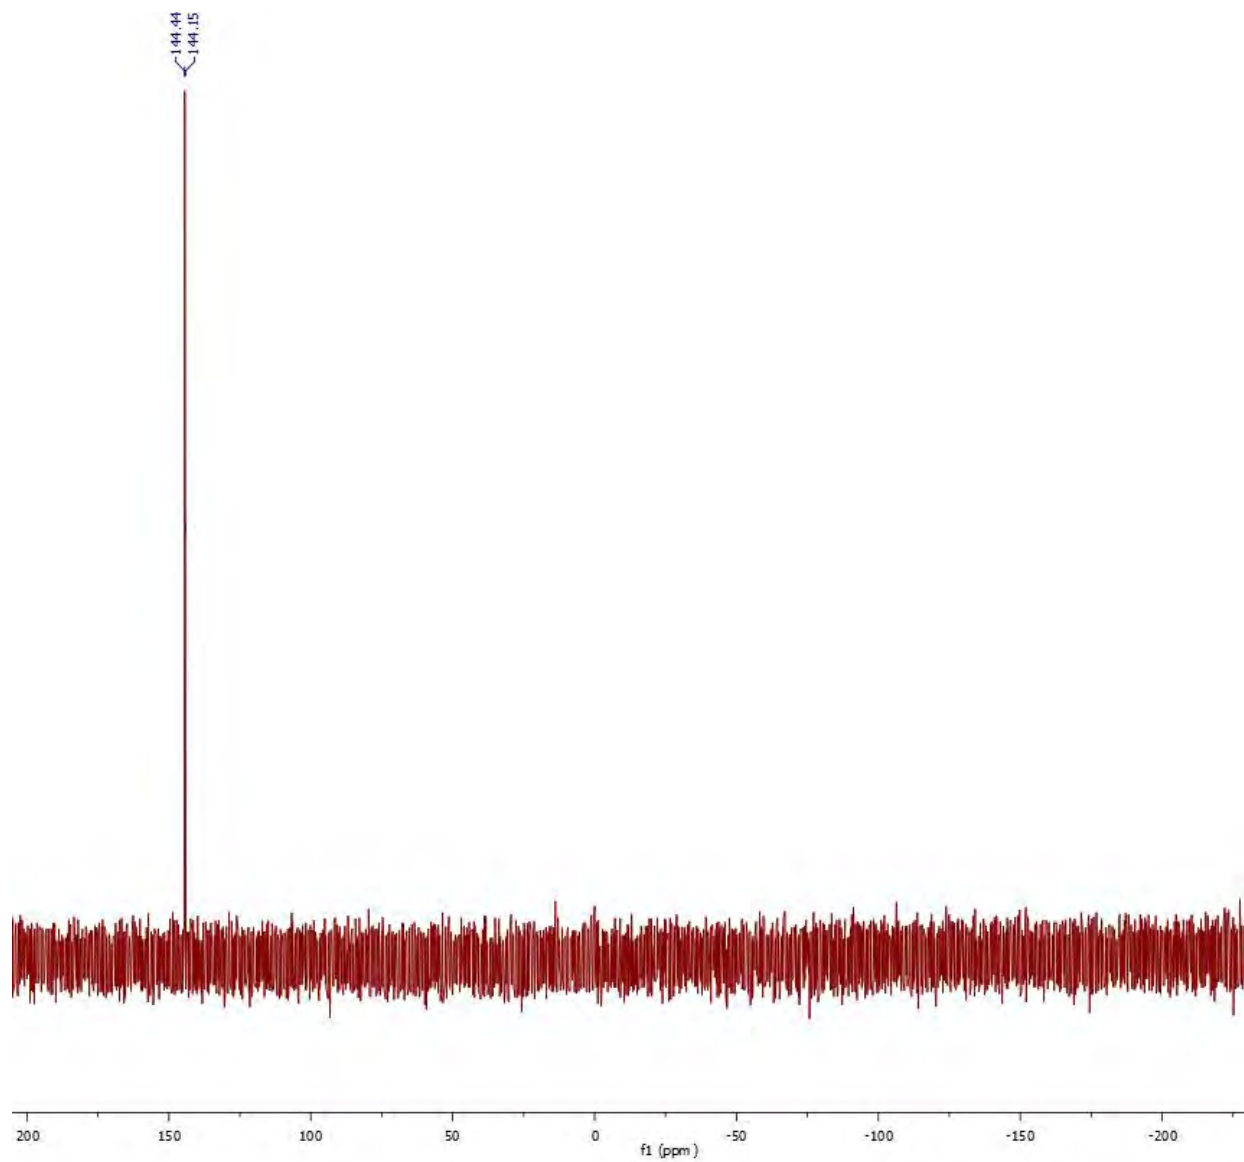



**Figure S8** (a)  $^1\text{H}$ , (b)  $^{13}\text{C}$  and (c)  $^{31}\text{P}$  NMR spectra of *N*-Isobutyryl-5'-*O*-(4,4'-dimethoxytrityl)-2'-*O*-TBDMS-guanosine-3'-*O*-[*O*-(2-cyanoethyl)-*N,N'*-ethylmethylphosphoramidite (**2a**). (a)

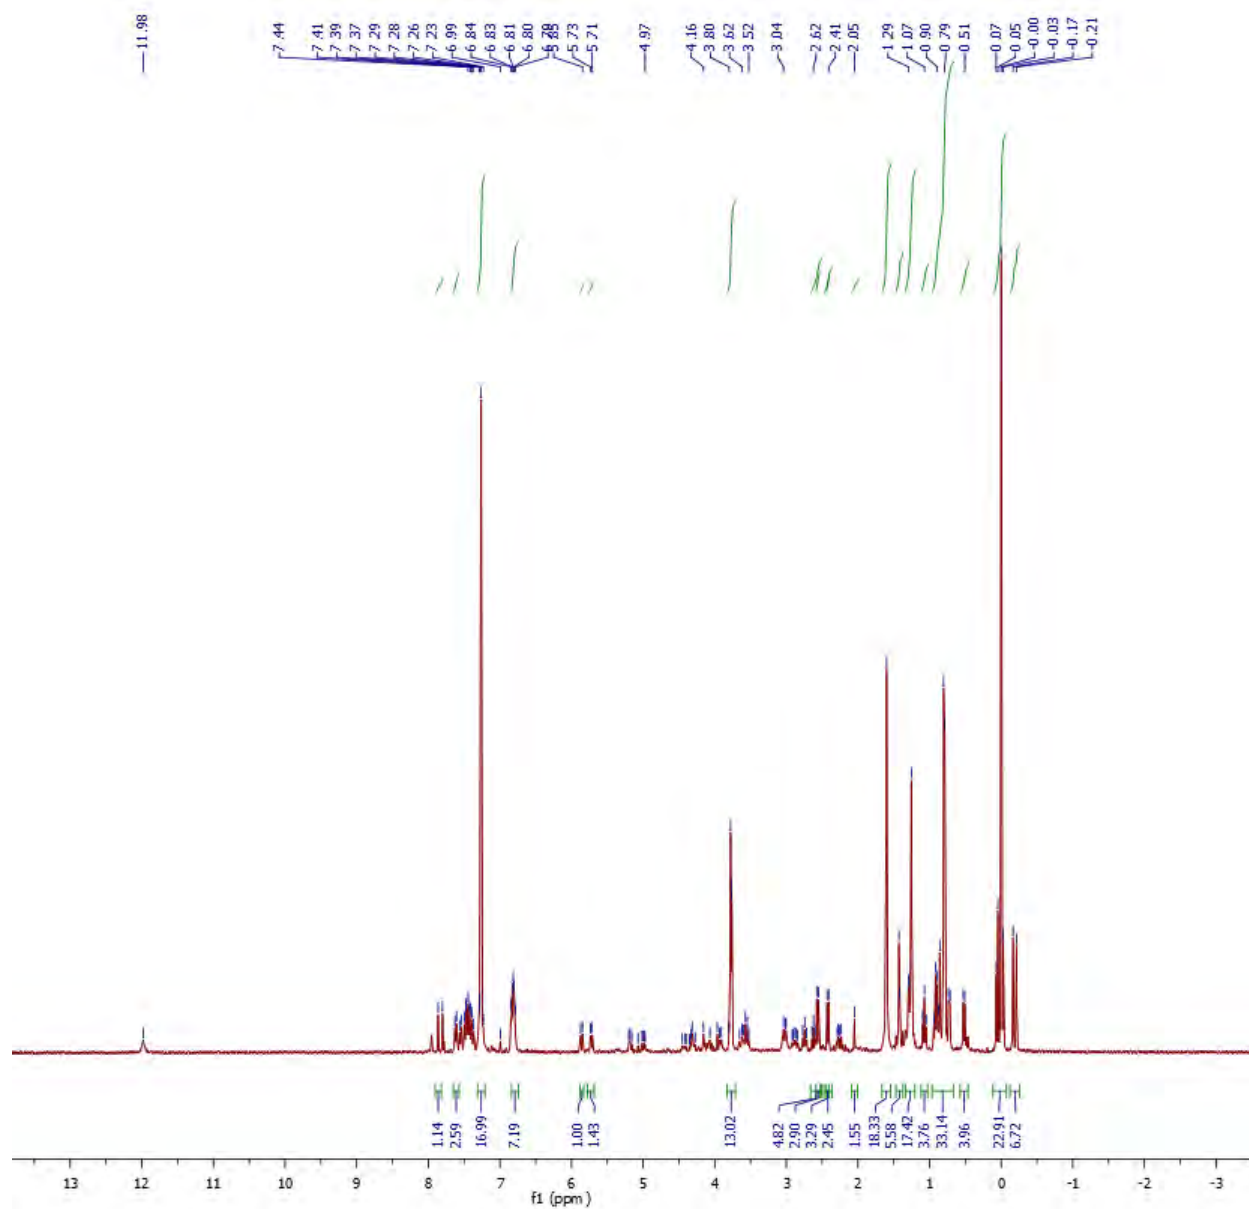

(b)

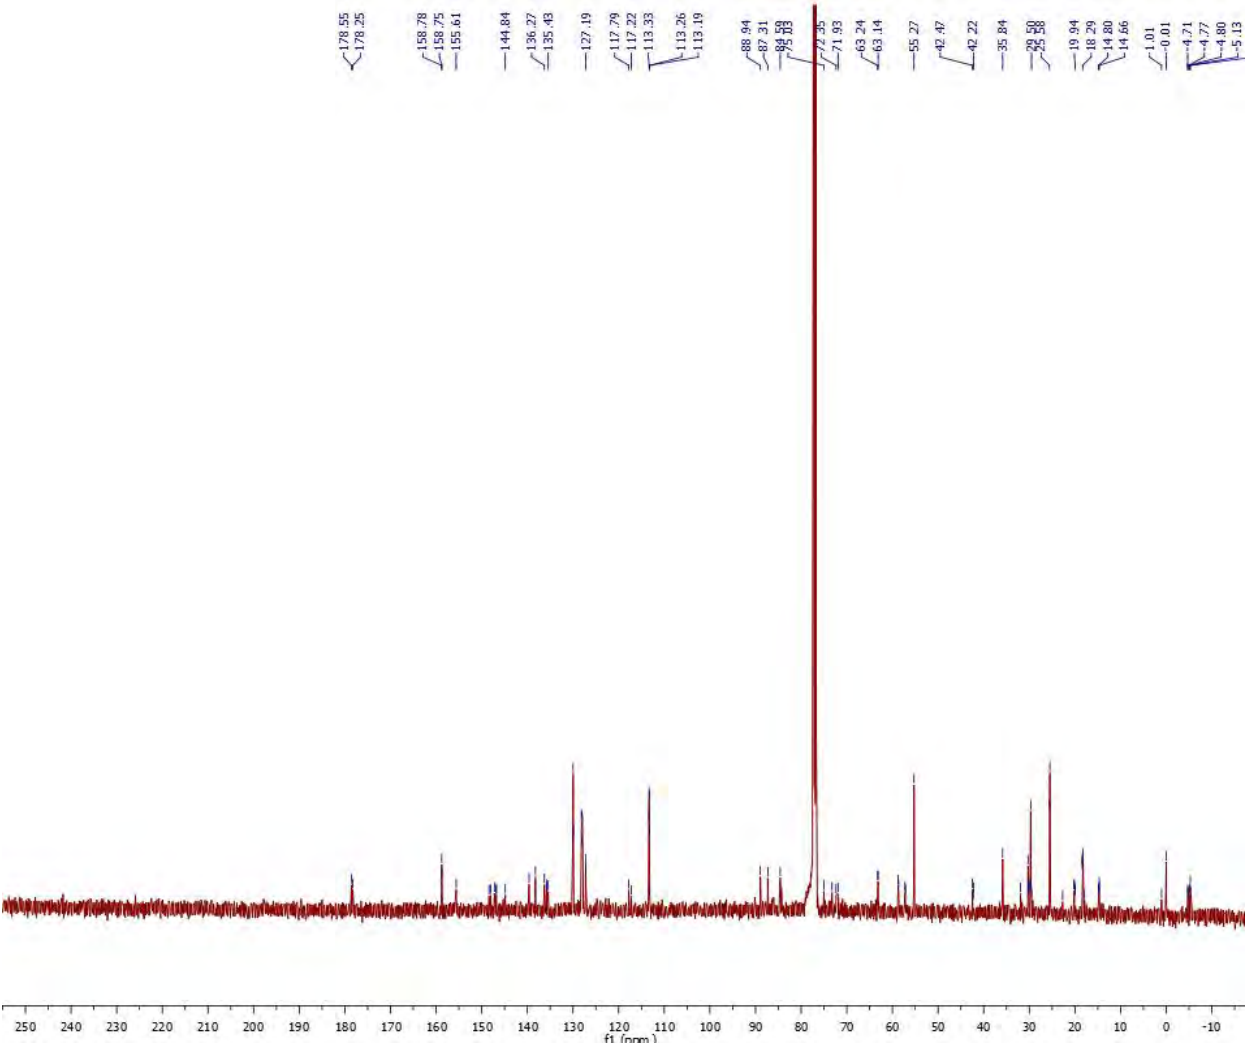

(c)

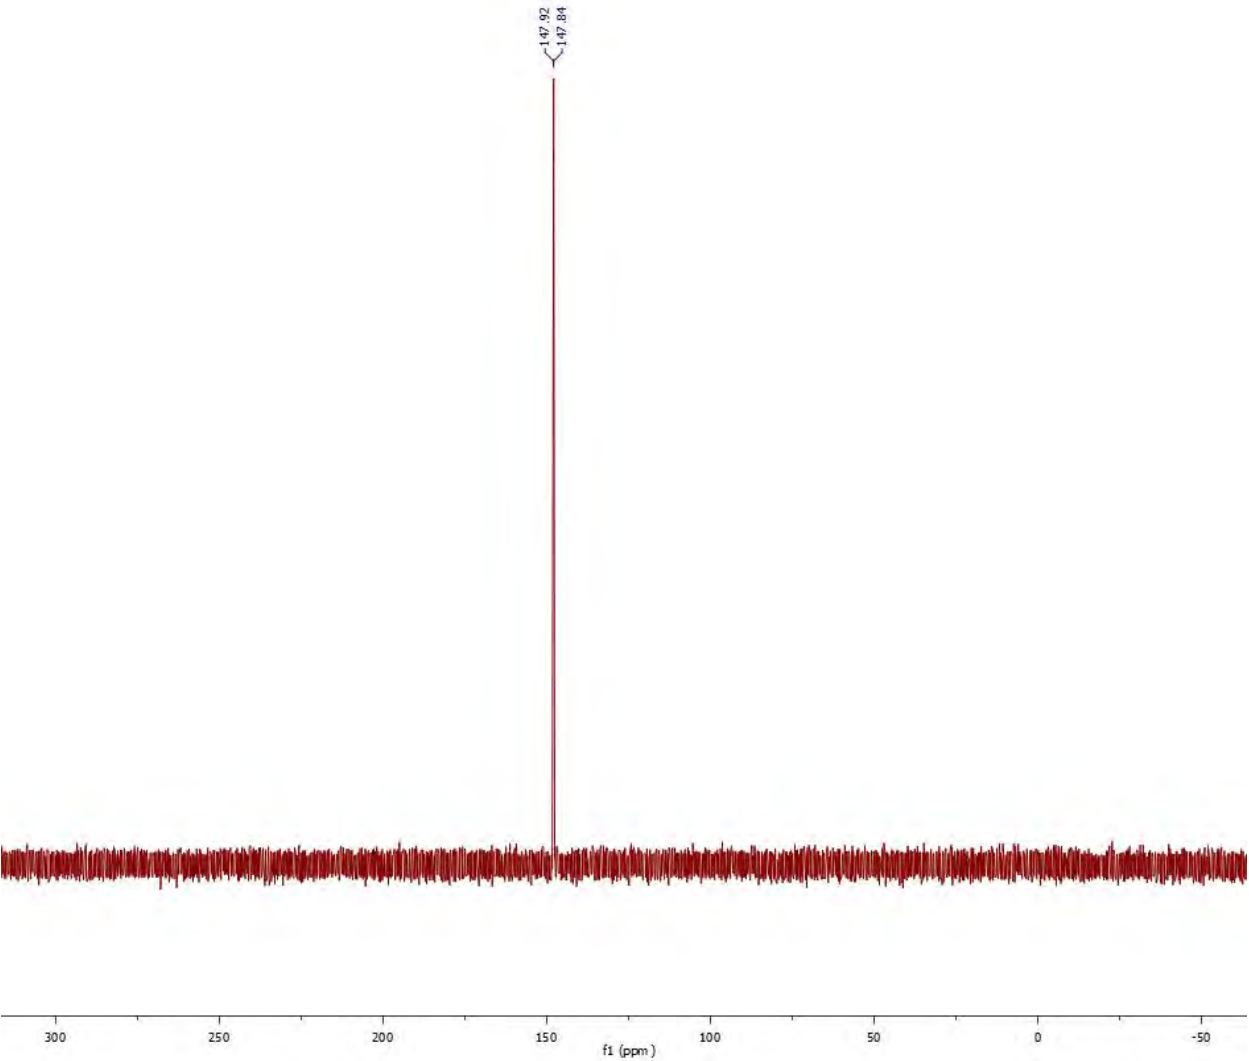

**Figure S9** (a)  $^1\text{H}$ , (b)  $^{13}\text{C}$  and (c)  $^{31}\text{P}$  NMR spectra of *N*-Benzoyl-5'-*O*-(4,4'-dimethoxytrityl)-2'-deoxycytidine-3'-*O*-[*O*-(2-cyanoethyl)-*N,N'*-ethylmethylphosphoramidite (**2b**).

(a)

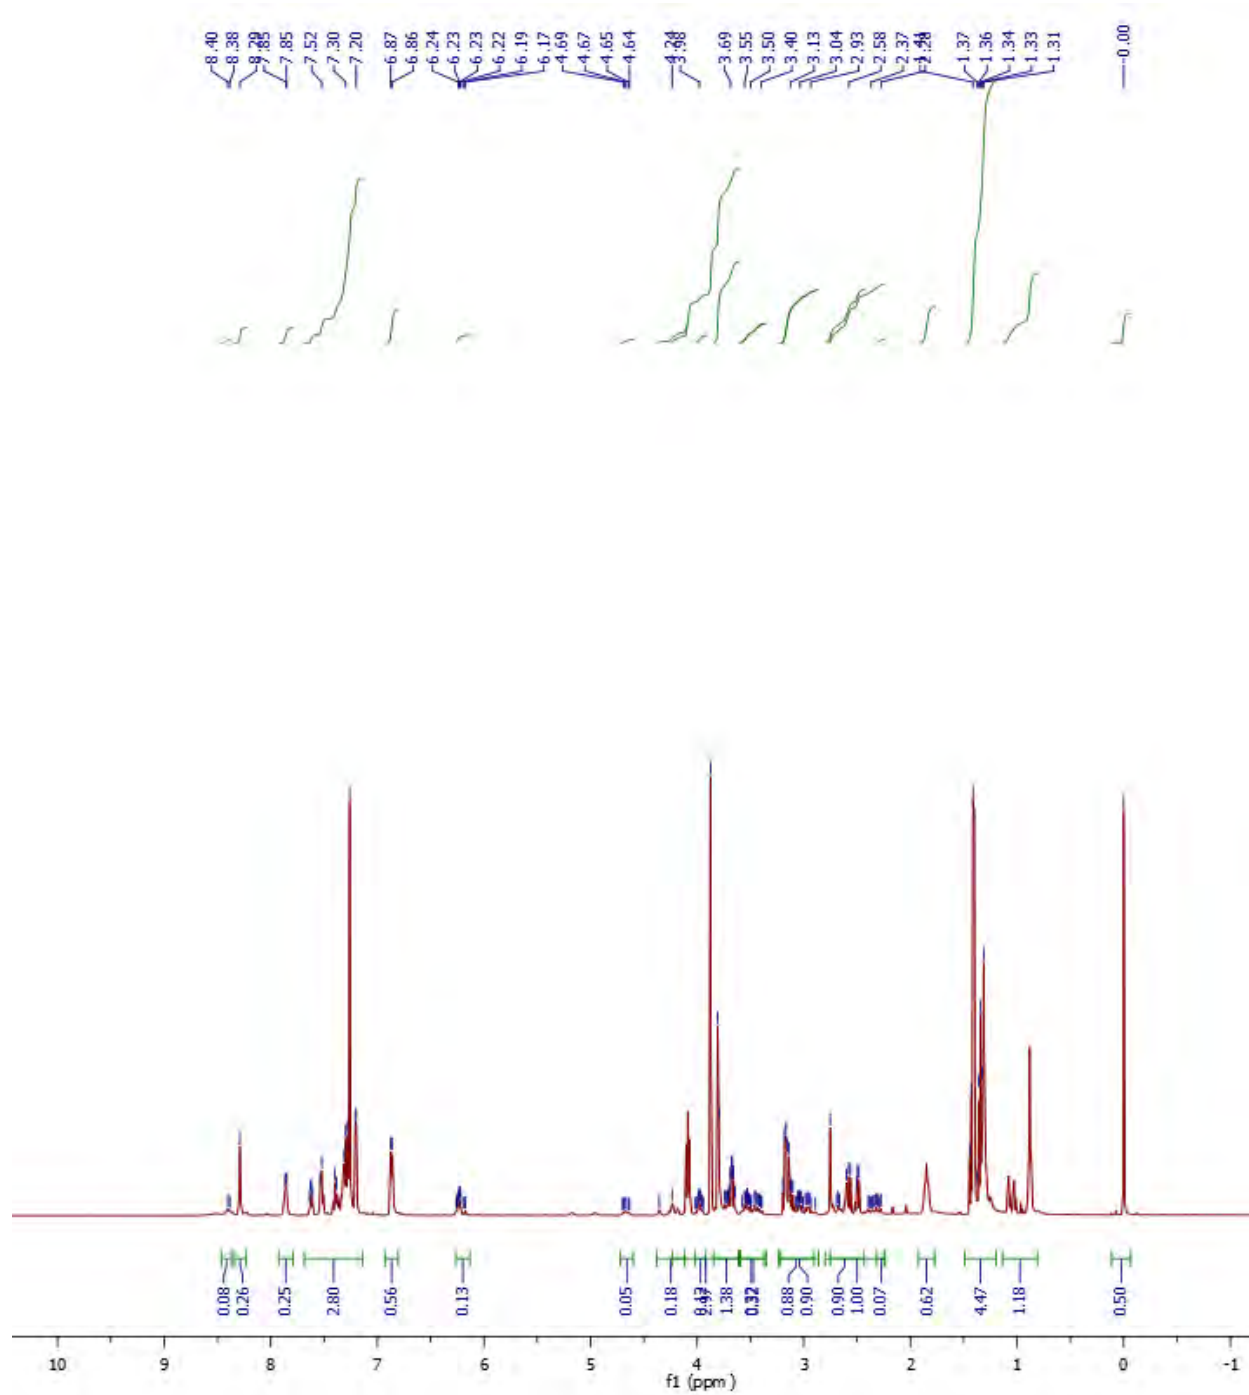

(b)

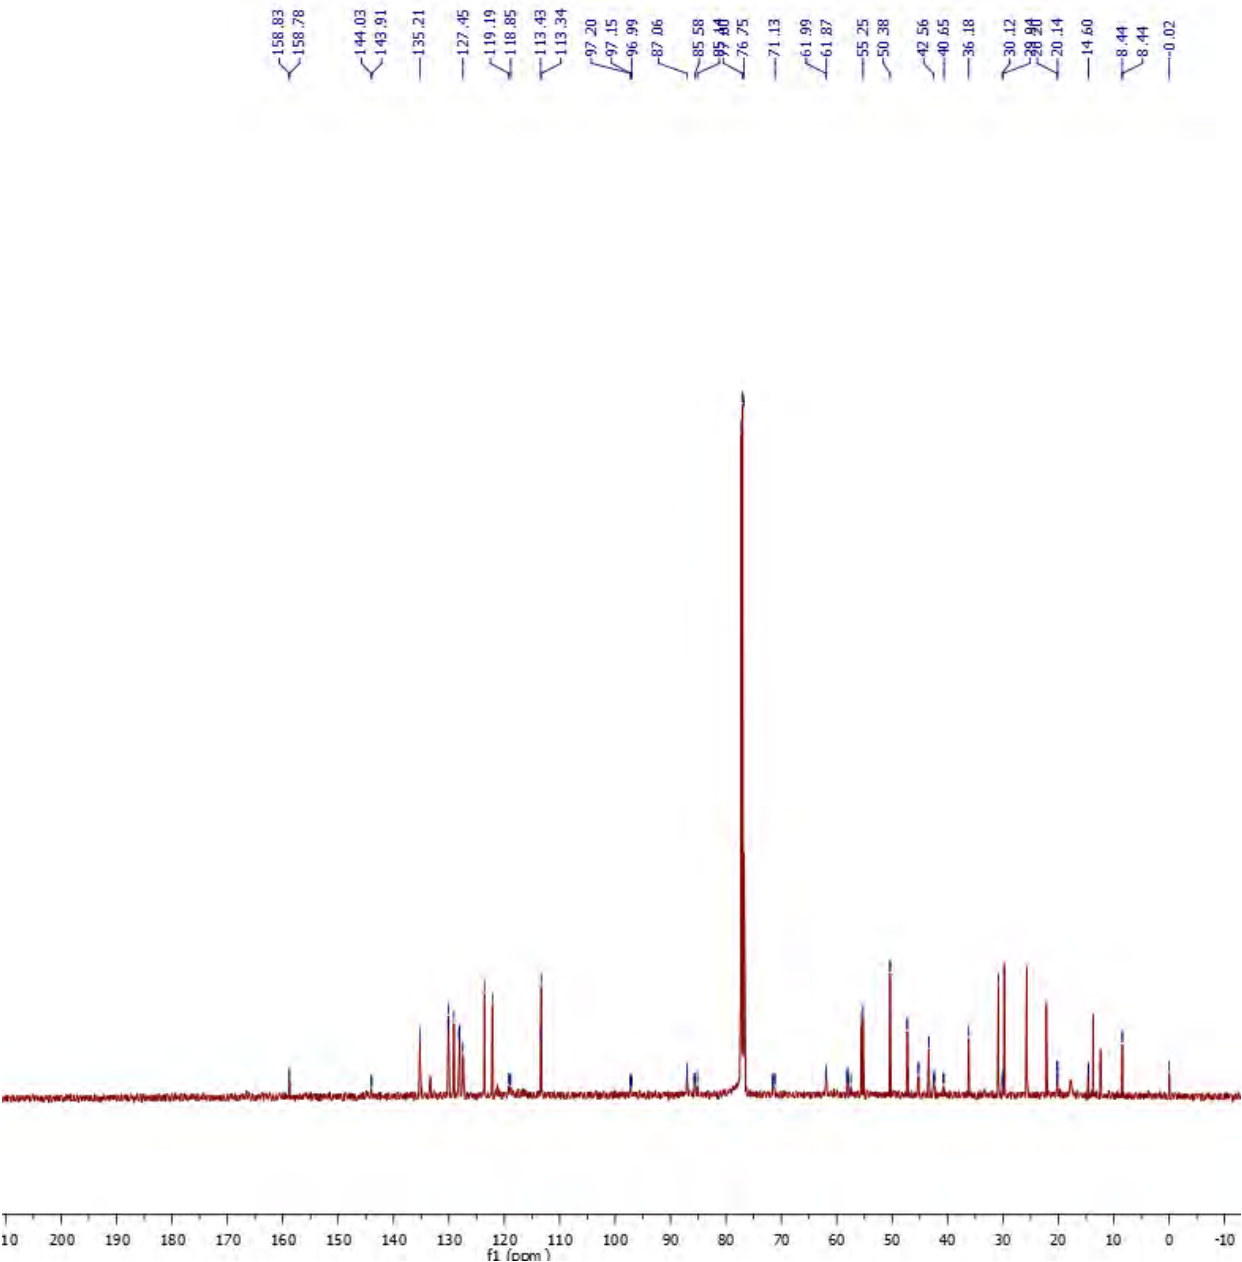

(c)

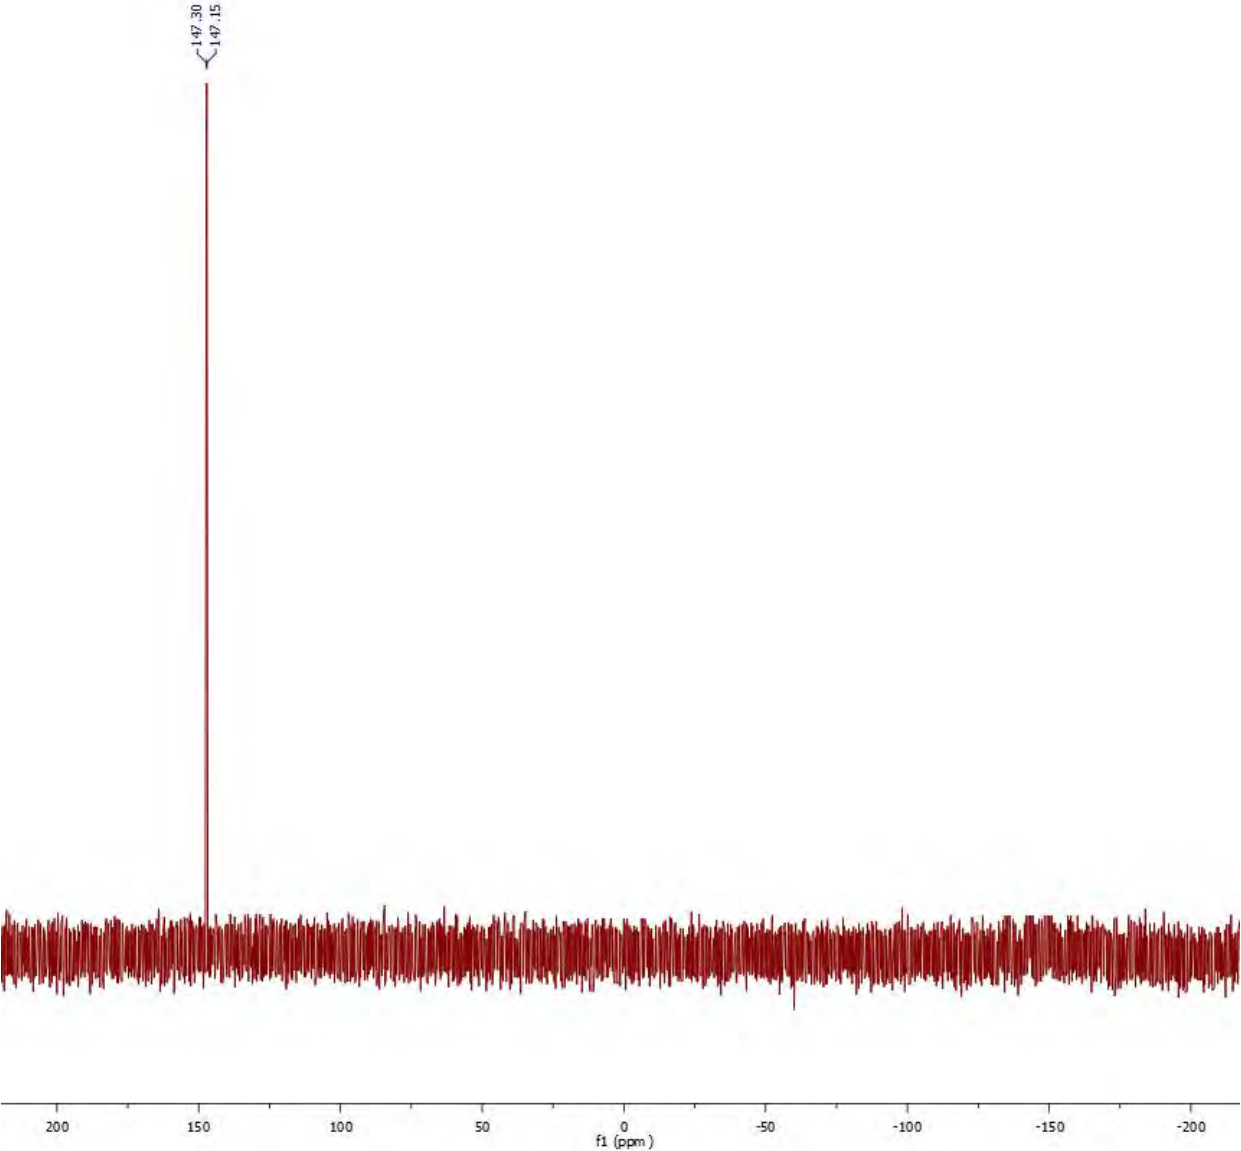

**Figure S10** (a)  $^1\text{H}$ , (b)  $^{13}\text{C}$  and (c)  $^{31}\text{P}$  NMR spectra of *N*-Benzoyl-5'-*O*-(4,4'-dimethoxytrityl)-2'-deoxyadenosine-3'-*O*-[*O*-(2-cyanoethyl)-*N,N'*-ethylmethylphosphoramidite (**2c**).(a)

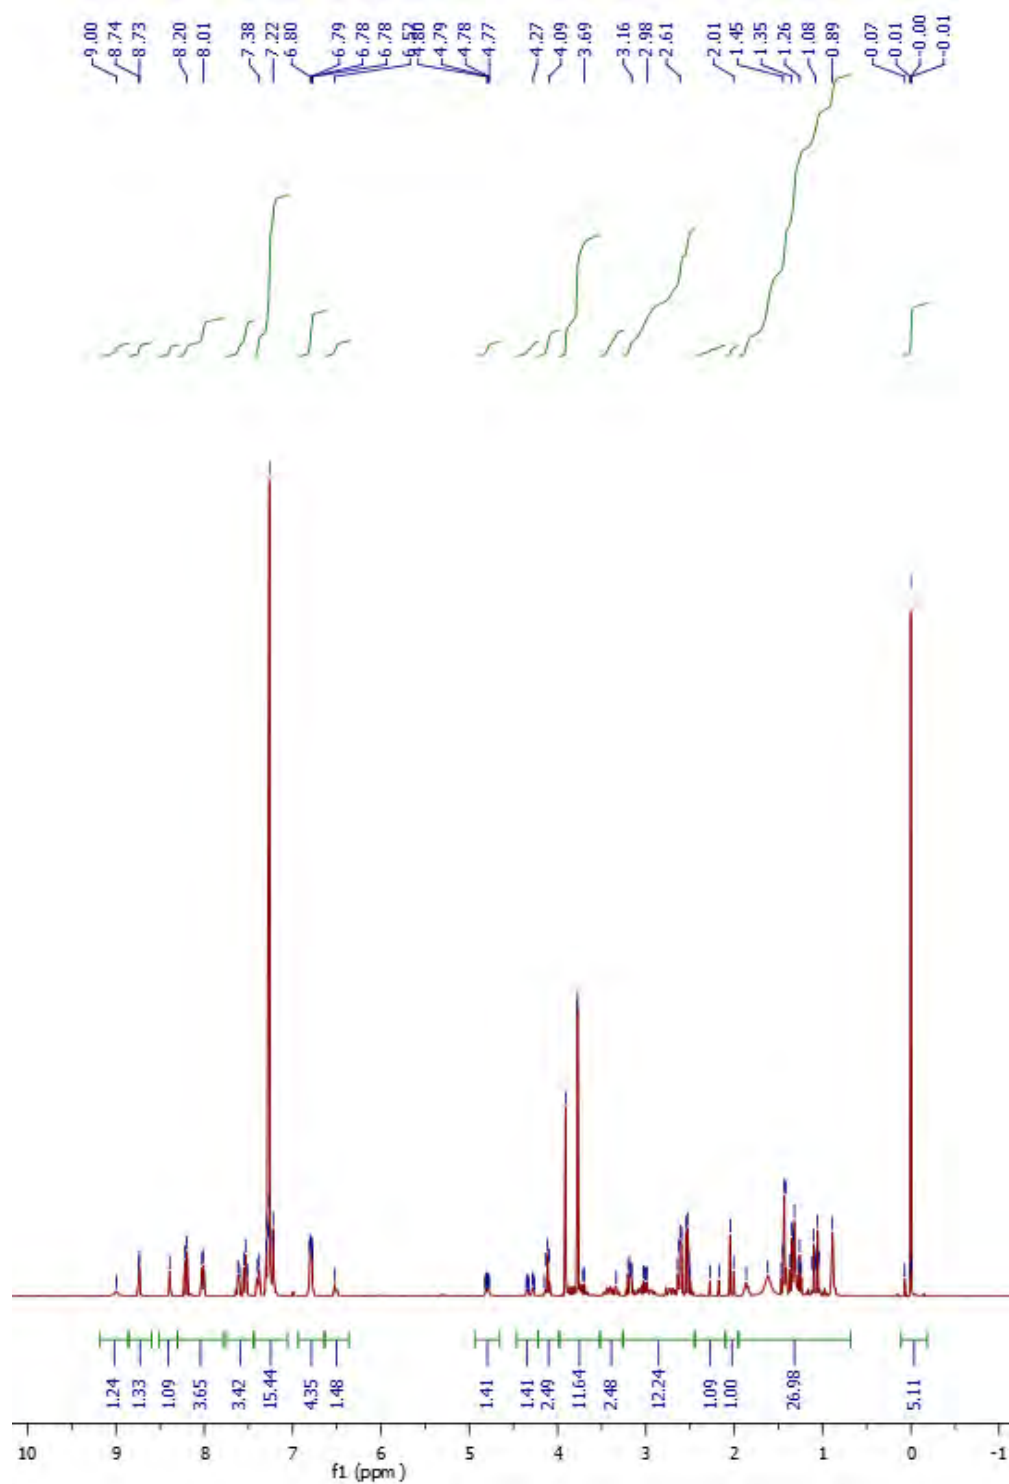

(b)

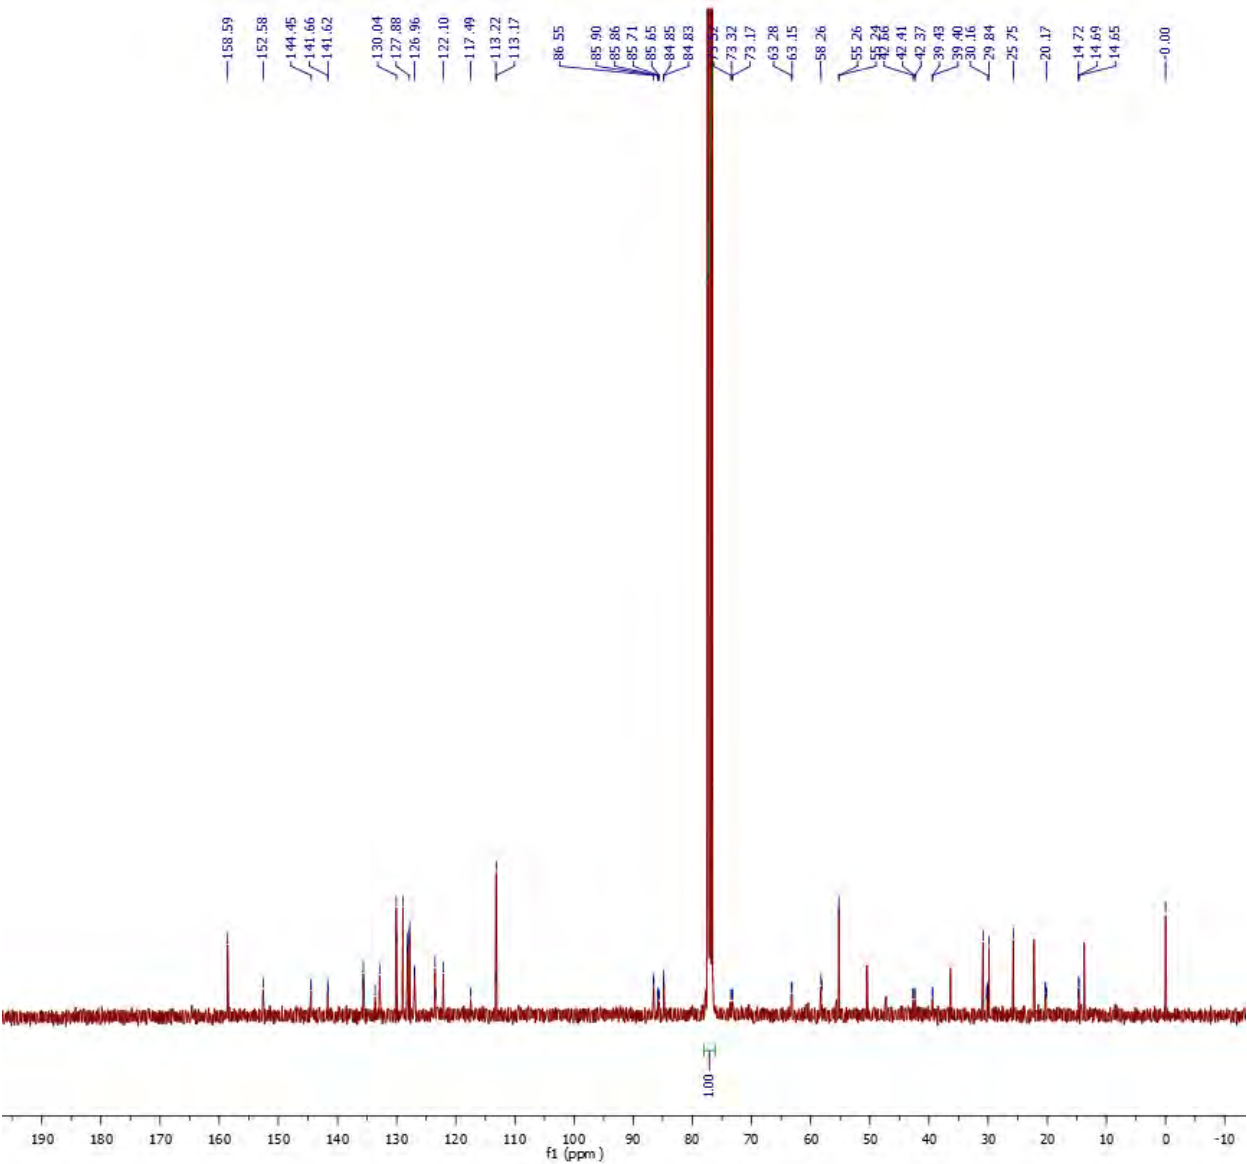



(c)

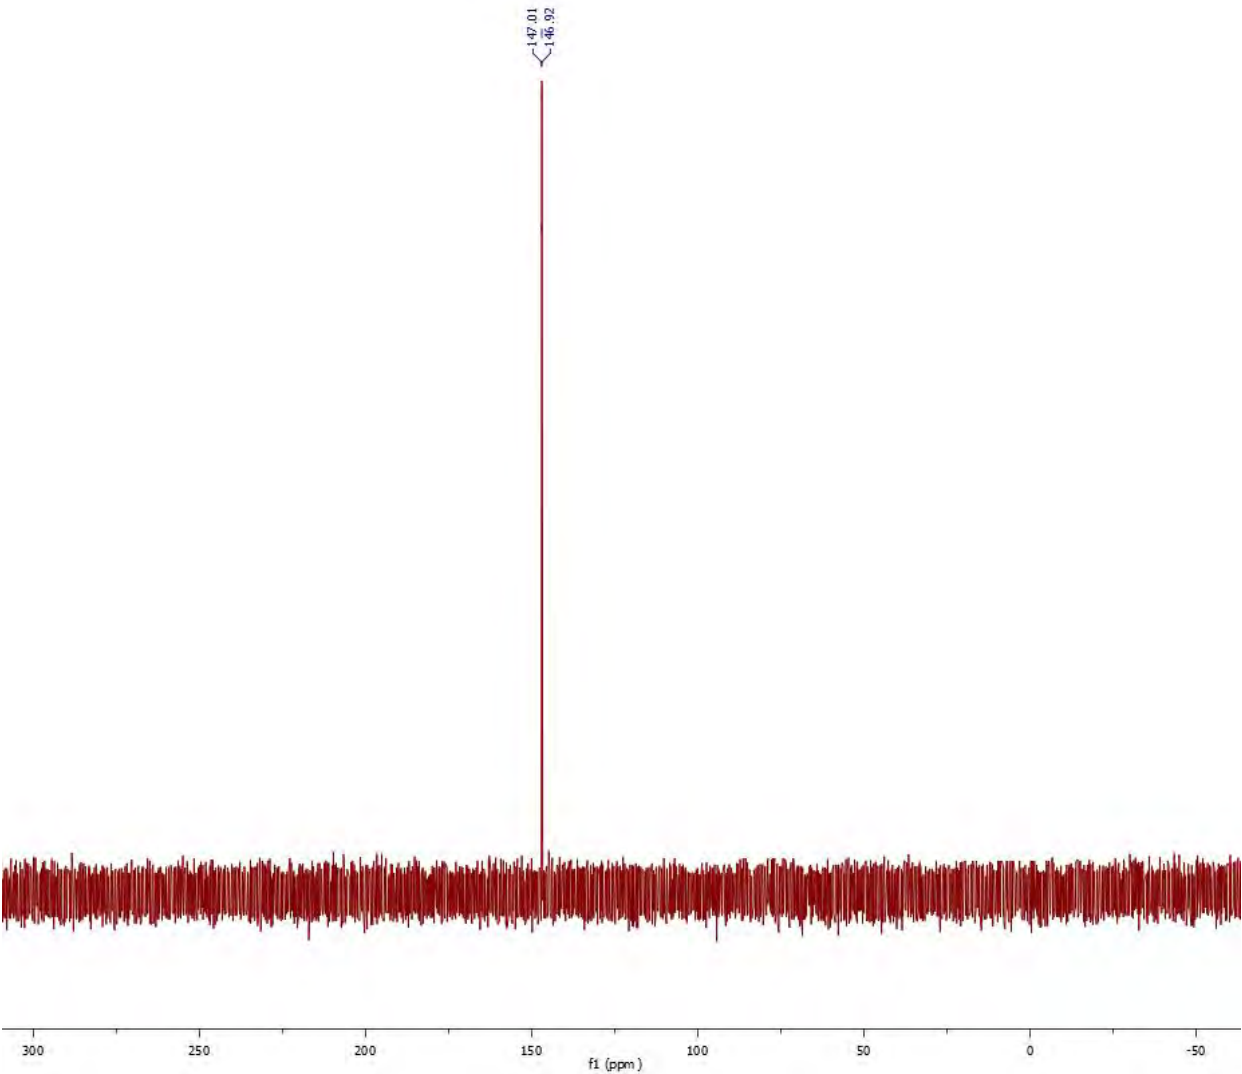

**Figure S11** (a)  $^1\text{H}$ , (b)  $^{13}\text{C}$  and (c)  $^{31}\text{P}$  NMR spectra of *N*-Isobutyryl-5'-*O*-(4,4'-dimethoxytrityl)-2'-*O*-TBDMS-guanosine-3'-*O*-[*O*,*O*-(2-cyanoethyl)-phosphoramidite (**4a**).(a)

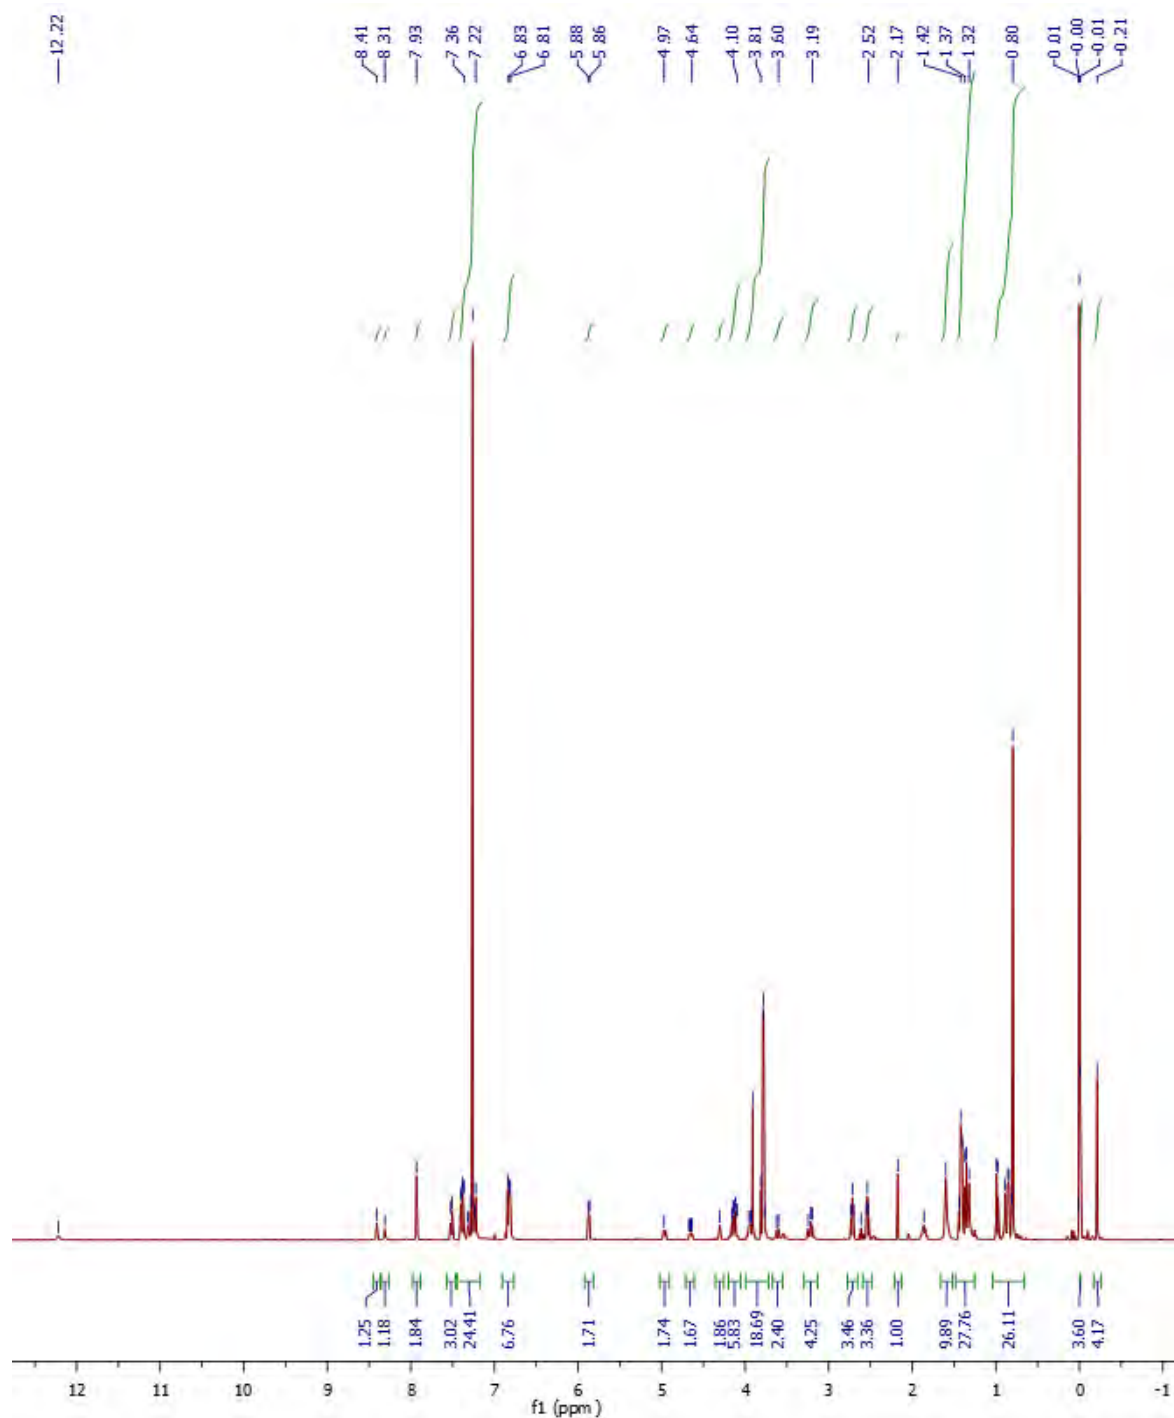

(b)

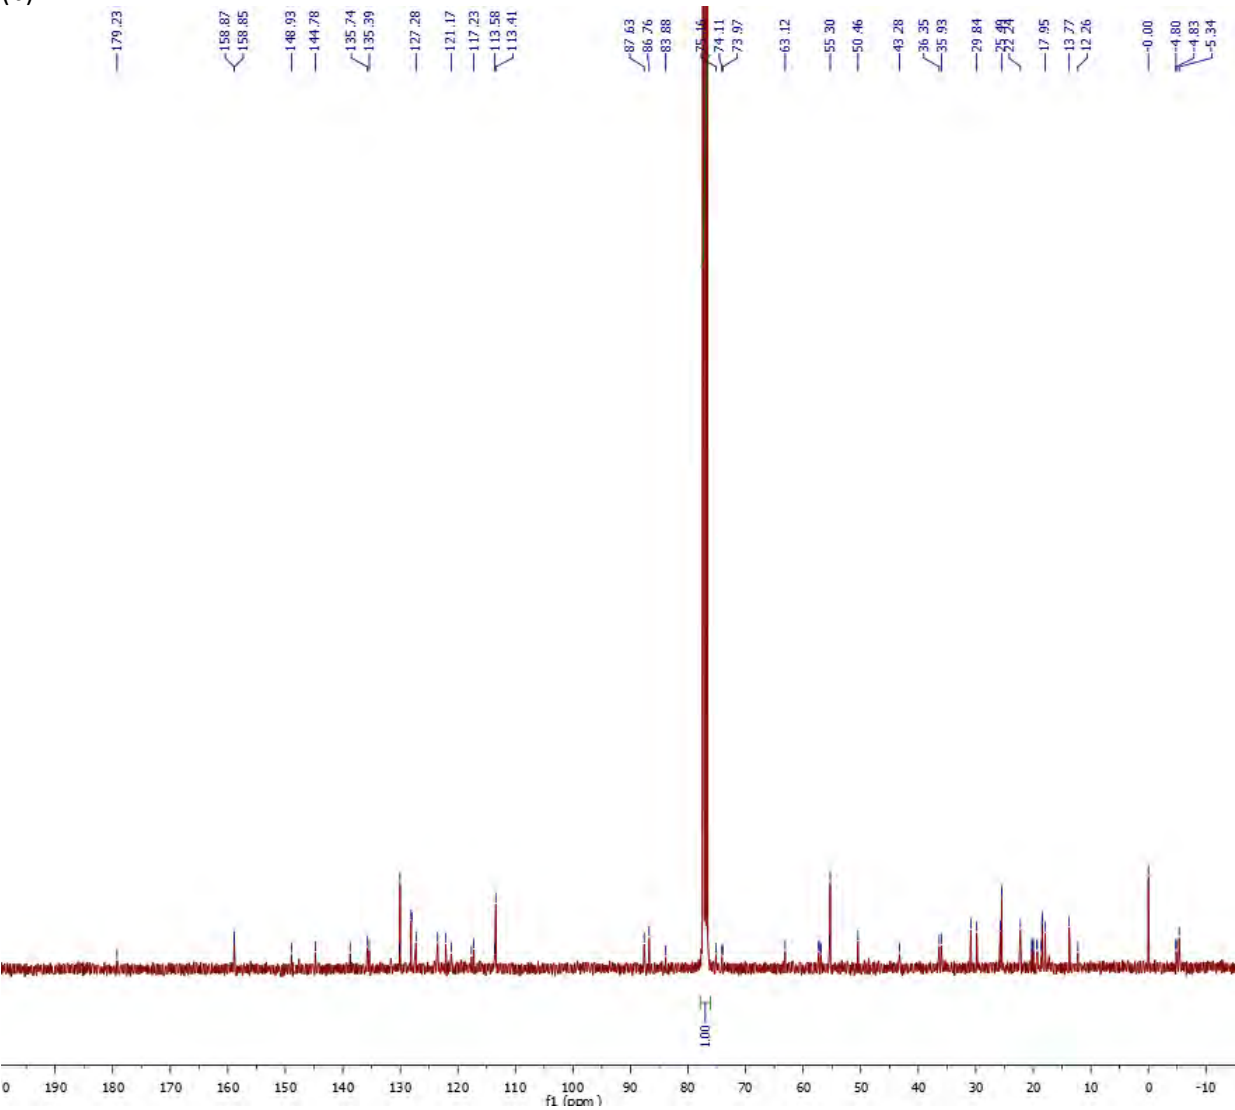

(c)

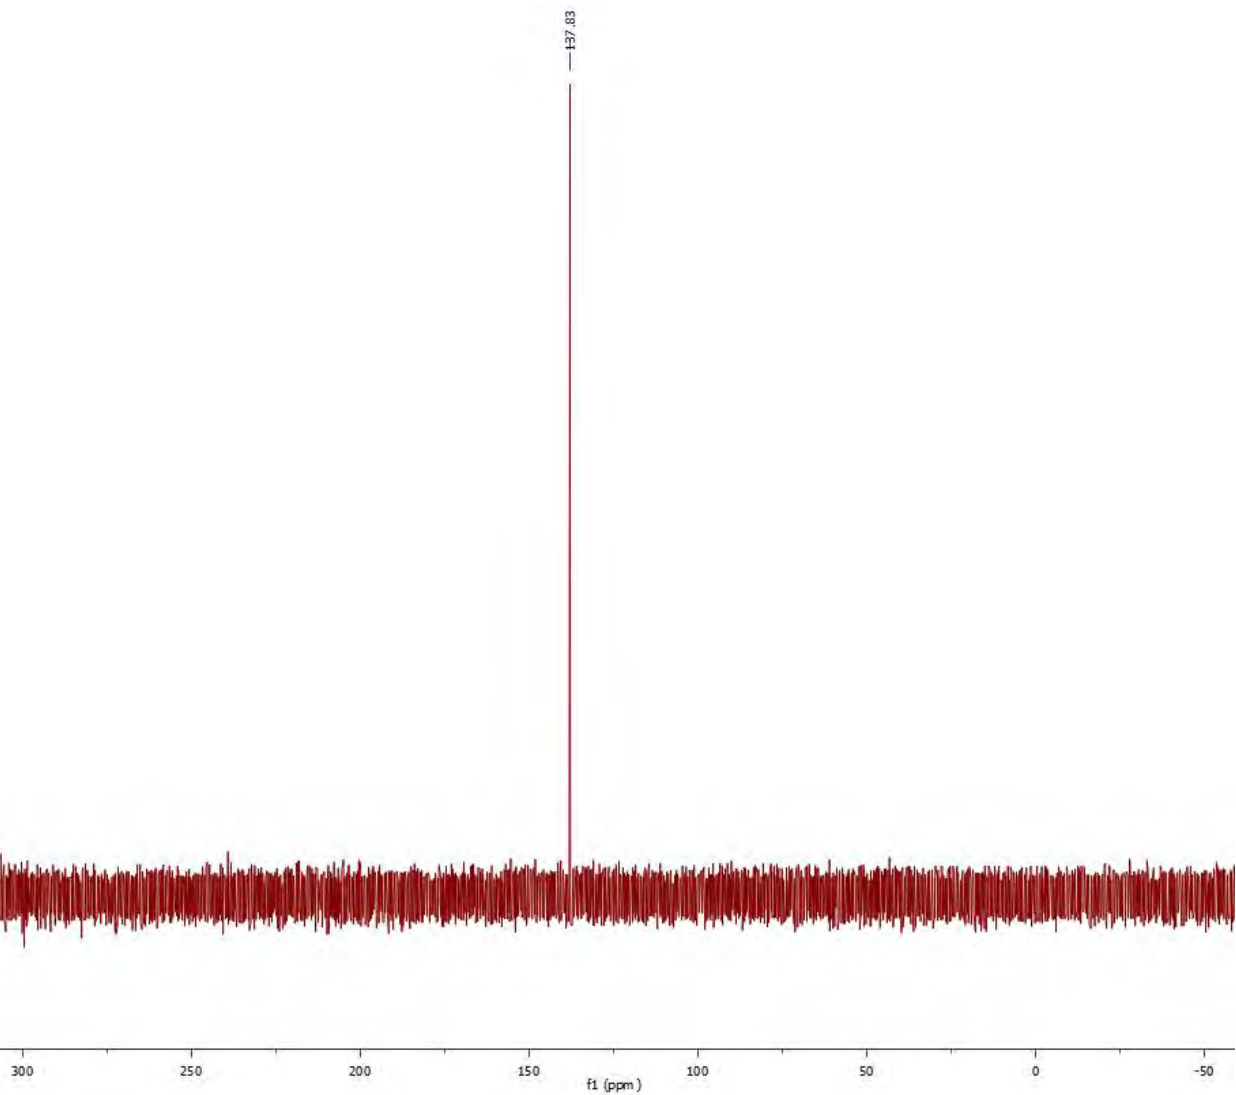

**Figure S12** (a)  $^1\text{H}$  and (b)  $^{31}\text{P}$  NMR spectra of *N*-Isobutyryl-5'-*O*-(4,4'-dimethoxytrityl)-2'-*O*-TBDMS-guanosine-3'-*O*-[*O*-(2-cyanoethyl)-*N*-pyrrolidinophosphoramidite (**3a**) in stabilized in  $[\text{C}_6\text{mim}][\text{FAP}]$ .(a)

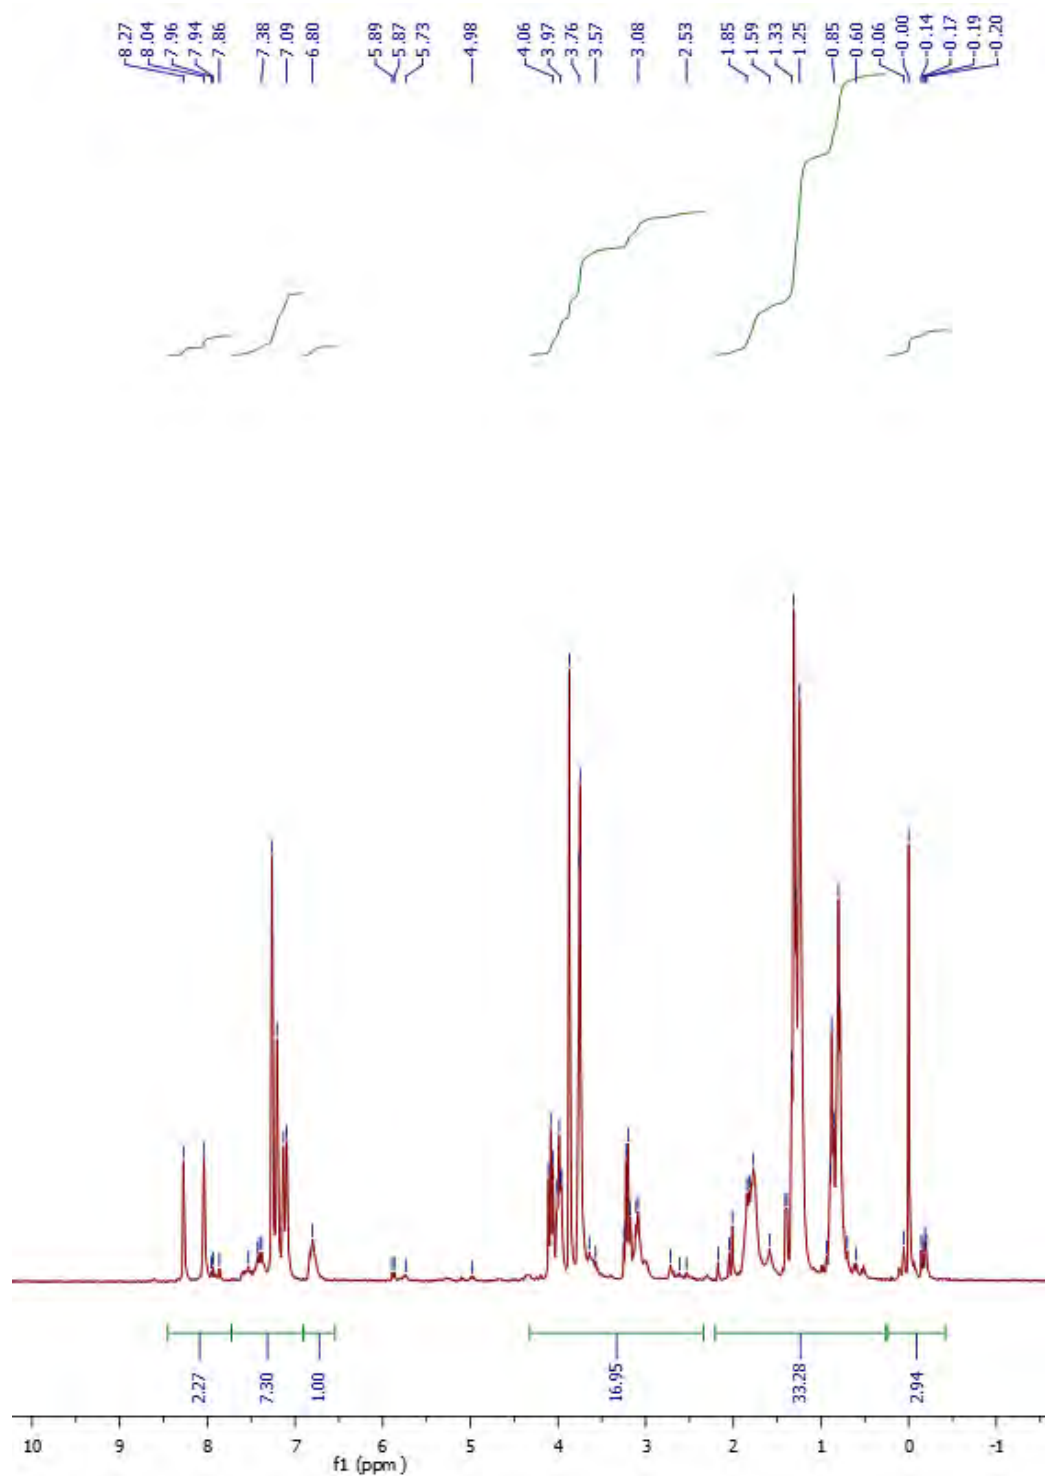

(b)

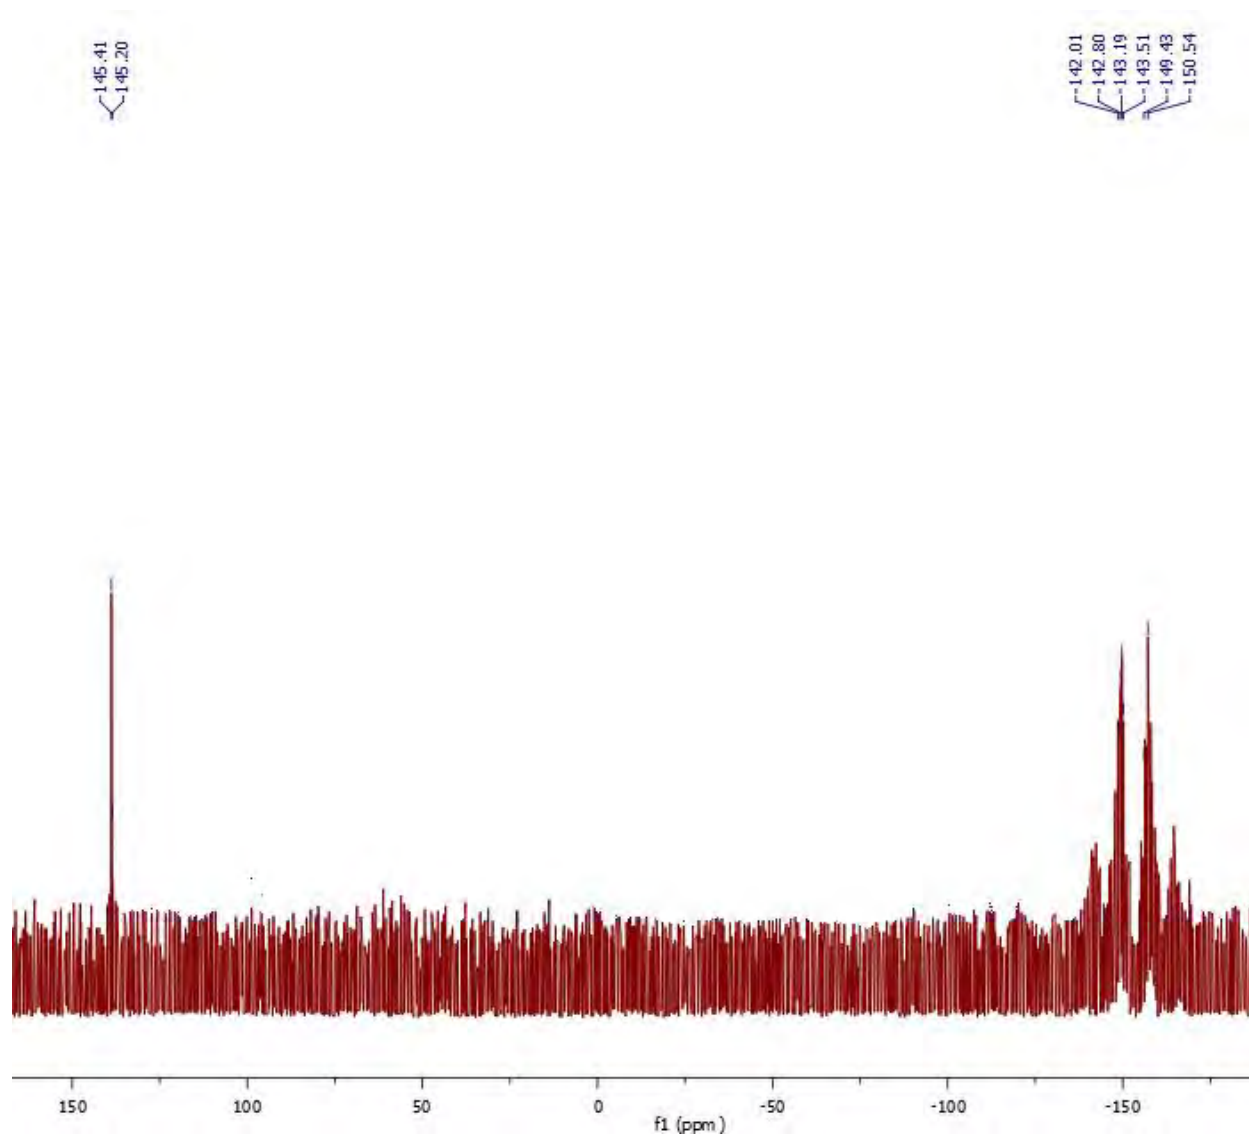

## References

- 1 P. Bonhôte, A. Dias, N. Papageorgiou, K. Kalyanasundaram and M. Grätzel, *Inorg. Chem.*, 1996, **35**, 1168-1178
